# Supplementary material for: Merging bioinspired incubation with supramolecular photocatalysis for Michaelis CO2 reduction beyond enzymes
Source: Research Square preprint supplement (doi:10.21203/rs.3.rs-8521926/v1), 2026-01-16

## checkCIF/PLATON report

You have not supplied any structure factors. As a result the full set of tests cannot be run.

THIS REPORT IS FOR GUIDANCE ONLY. IF USED AS PART OF A REVIEW PROCEDURE FOR PUBLICATION, IT SHOULD NOT REPLACE THE EXPERTISE OF AN EXPERIENCED CRYSTALLOGRAPHIC REFEREE.

No syntax errors found.      CIF dictionary      Interpreting this report

### Datablock: 1\_c

---

|                        |                                                                       |                                                                |                |
|------------------------|-----------------------------------------------------------------------|----------------------------------------------------------------|----------------|
| Bond precision:        | C-C = 0.0258 A                                                        | Wavelength=1.54178                                             |                |
| Cell:                  | a=37.098 (2)                                                          | b=29.5954 (16)                                                 | c=23.5807 (13) |
|                        | alpha=90                                                              | beta=102.756 (3)                                               | gamma=90       |
| Temperature:           | 193 K                                                                 |                                                                |                |
|                        | Calculated                                                            | Reported                                                       |                |
| Volume                 | 25251 (2)                                                             | 25251 (2)                                                      |                |
| Space group            | C 2                                                                   | C 2                                                            |                |
| Hall group             | C 2y                                                                  | C 2y                                                           |                |
| Moiety formula         | C168 H108 Cl4 Fe3 N12 O20<br>Zr6, C168 H108 Cl2 Fe3 N12<br>O20 Zr6, 8 | C168 H114 N12 O20 Zr6 Fe3<br>Cl3, 4(C3 H7 N O), 5(O),<br>2(Cl) |                |
| Sum formula            | C360 H272 Cl10 Fe6 N32 O58<br>Zr12 [+ solvent]                        | C360 H272 Cl10 Fe6 N32 O58<br>Zr12                             |                |
| Mr                     | 7758.35                                                               | 7758.32                                                        |                |
| Dx, g cm <sup>-3</sup> | 1.020                                                                 | 1.020                                                          |                |
| Z                      | 2                                                                     | 2                                                              |                |
| Mu (mm <sup>-1</sup> ) | 4.196                                                                 | 4.196                                                          |                |
| F000                   | 7852.0                                                                | 7852.0                                                         |                |
| F000'                  | 7860.93                                                               |                                                                |                |
| h, k, lmax             | 44, 35, 28                                                            | 44, 35, 28                                                     |                |
| Nref                   | 46446 [ 23711]                                                        | 45636                                                          |                |
| Tmin, Tmax             | 0.403, 0.414                                                          | 0.365, 0.420                                                   |                |
| Tmin'                  | 0.305                                                                 |                                                                |                |

Correction method= # Reported T Limits: Tmin=0.365 Tmax=0.420  
AbsCorr = MULTI-SCAN

Data completeness= 1.92/0.98      Theta(max)= 68.423

R(reflections)= 0.0754( 30760)

wR2(reflections)=  
0.2253( 45636)

S = 0.983

Npar= 2131

---

The following ALERTS were generated. Each ALERT has the format

**test-name\_ALERT\_alert-type\_alert-level.**

Click on the hyperlinks for more details of the test.

---

[IMAGE] **Alert level B**

|                   |            |                                             |                                 |         |       |
|-------------------|------------|---------------------------------------------|---------------------------------|---------|-------|
| PLAT241_ALERT_2_B | High       | 'MainMol'                                   | Ueq as Compared to Neighbors of | C152    | Check |
| PLAT241_ALERT_2_B | High       | 'MainMol'                                   | Ueq as Compared to Neighbors of | Fe1     | Check |
| PLAT242_ALERT_2_B | Low        | 'MainMol'                                   | Ueq as Compared to Neighbors of | C147    | Check |
| PLAT260_ALERT_2_B | Large      | Average Ueq of Residue Including            | O25                             | 0.373   | Check |
| PLAT260_ALERT_2_B | Large      | Average Ueq of Residue Including            | O24                             | 0.351   | Check |
| PLAT306_ALERT_2_B | Isolated   | Oxygen Atom (H-atoms Missing ?)             | .....                           | O21     | Check |
| PLAT306_ALERT_2_B | Isolated   | Oxygen Atom (H-atoms Missing ?)             | .....                           | O22     | Check |
| PLAT306_ALERT_2_B | Isolated   | Oxygen Atom (H-atoms Missing ?)             | .....                           | O23     | Check |
| PLAT306_ALERT_2_B | Isolated   | Oxygen Atom (H-atoms Missing ?)             | .....                           | O24     | Check |
| PLAT306_ALERT_2_B | Isolated   | Oxygen Atom (H-atoms Missing ?)             | .....                           | O27     | Check |
| PLAT342_ALERT_3_B | Low        | Bond Precision on C-C Bonds                 | .....                           | 0.02576 | Ang.  |
| PLAT368_ALERT_2_B | Short      | C(sp2)-C(sp2) Bond                          | C76 - C76_a .                   | 1.12    | Ang.  |
| PLAT369_ALERT_2_B | Long       | C(sp2)-C(sp2) Bond                          | C153 - C153_b .                 | 1.60    | Ang.  |
| PLAT369_ALERT_2_B | Long       | C(sp2)-C(sp2) Bond                          | C1 - C2 .                       | 1.57    | Ang.  |
| PLAT369_ALERT_2_B | Long       | C(sp2)-C(sp2) Bond                          | C33 - C50 .                     | 1.58    | Ang.  |
| PLAT369_ALERT_2_B | Long       | C(sp2)-C(sp2) Bond                          | C74 - C79 .                     | 1.64    | Ang.  |
| PLAT430_ALERT_2_B | Short      | Inter D...A Contact                         | O7 ..O301 .                     | 2.69    | Ang.  |
|                   |            |                                             | x,y,z =                         | 1_555   | Check |
| PLAT430_ALERT_2_B | Short      | Inter D...A Contact                         | O13 ..O26 .                     | 2.70    | Ang.  |
|                   |            |                                             | 1-x,1+y,1-z =                   | 2_666   | Check |
| PLAT987_ALERT_1_B | The        | Flack x is >> 0 - Do a BASF/TWIN Refinement |                                 | Please  | Check |
| PLAT990_ALERT_1_B | Deprecated | .res/.hkl Input Style SQUEEZE Job ...       |                                 | !       | Note  |

---

[IMAGE] **Alert level C**

STRVA01\_ALERT\_4\_C                      Flack test results are ambiguous.  
From the CIF: \_refine\_ls\_abs\_structure\_Flack                      0.449  
From the CIF: \_refine\_ls\_abs\_structure\_Flack\_su                      0.012

|                   |            |           |                                   |      |        |
|-------------------|------------|-----------|-----------------------------------|------|--------|
| PLAT214_ALERT_2_C | Atom       | O24       | (Anion/Solvent) ADP max/min Ratio | 4.4  | oblate |
| PLAT220_ALERT_2_C | NonSolvent | Resd 1 C  | Ueq(max)/Ueq(min) Range           | 4.7  | Ratio  |
| PLAT222_ALERT_3_C | NonSolvent | Resd 1 H  | Uiso(max)/Uiso(min) Range         | 4.2  | Ratio  |
| PLAT241_ALERT_2_C | High       | 'MainMol' | Ueq as Compared to Neighbors of   | Fe4  | Check  |
| PLAT241_ALERT_2_C | High       | 'MainMol' | Ueq as Compared to Neighbors of   | C02U | Check  |
| PLAT241_ALERT_2_C | High       | 'MainMol' | Ueq as Compared to Neighbors of   | C03S | Check  |
| PLAT241_ALERT_2_C | High       | 'MainMol' | Ueq as Compared to Neighbors of   | C03W | Check  |
| PLAT241_ALERT_2_C | High       | 'MainMol' | Ueq as Compared to Neighbors of   | C056 | Check  |
| PLAT241_ALERT_2_C | High       | 'MainMol' | Ueq as Compared to Neighbors of   | C91  | Check  |
| PLAT241_ALERT_2_C | High       | 'MainMol' | Ueq as Compared to Neighbors of   | C92  | Check  |
| PLAT241_ALERT_2_C | High       | 'MainMol' | Ueq as Compared to Neighbors of   | C101 | Check  |
| PLAT241_ALERT_2_C | High       | 'MainMol' | Ueq as Compared to Neighbors of   | C114 | Check  |
| PLAT241_ALERT_2_C | High       | 'MainMol' | Ueq as Compared to Neighbors of   | C122 | Check  |
| PLAT241_ALERT_2_C | High       | 'MainMol' | Ueq as Compared to Neighbors of   | C135 | Check  |
| PLAT241_ALERT_2_C | High       | 'MainMol' | Ueq as Compared to Neighbors of   | C137 | Check  |
| PLAT241_ALERT_2_C | High       | 'MainMol' | Ueq as Compared to Neighbors of   | C142 | Check  |
| PLAT241_ALERT_2_C | High       | 'MainMol' | Ueq as Compared to Neighbors of   | C146 | Check  |

|                   |                                                  |                    |                 |                             |      |             |
|-------------------|--------------------------------------------------|--------------------|-----------------|-----------------------------|------|-------------|
| PLAT241_ALERT_2_C | High                                             | 'MainMol'          | Ueq             | as Compared to Neighbors of | C151 | Check       |
| PLAT241_ALERT_2_C | High                                             | 'MainMol'          | Ueq             | as Compared to Neighbors of | C167 | Check       |
| PLAT241_ALERT_2_C | High                                             | 'MainMol'          | Ueq             | as Compared to Neighbors of | C1   | Check       |
| PLAT241_ALERT_2_C | High                                             | 'MainMol'          | Ueq             | as Compared to Neighbors of | C4   | Check       |
| PLAT241_ALERT_2_C | High                                             | 'MainMol'          | Ueq             | as Compared to Neighbors of | C10  | Check       |
| PLAT241_ALERT_2_C | High                                             | 'MainMol'          | Ueq             | as Compared to Neighbors of | C14  | Check       |
| PLAT241_ALERT_2_C | High                                             | 'MainMol'          | Ueq             | as Compared to Neighbors of | C35  | Check       |
| PLAT241_ALERT_2_C | High                                             | 'MainMol'          | Ueq             | as Compared to Neighbors of | C41  | Check       |
| PLAT241_ALERT_2_C | High                                             | 'MainMol'          | Ueq             | as Compared to Neighbors of | C60  | Check       |
| PLAT241_ALERT_2_C | High                                             | 'MainMol'          | Ueq             | as Compared to Neighbors of | C65  | Check       |
| PLAT241_ALERT_2_C | High                                             | 'MainMol'          | Ueq             | as Compared to Neighbors of | C80  | Check       |
| PLAT241_ALERT_2_C | High                                             | 'MainMol'          | Ueq             | as Compared to Neighbors of | C82  | Check       |
| PLAT242_ALERT_2_C | Low                                              | 'MainMol'          | Ueq             | as Compared to Neighbors of | Zr4  | Check       |
| PLAT242_ALERT_2_C | Low                                              | 'MainMol'          | Ueq             | as Compared to Neighbors of | Zr5  | Check       |
| PLAT242_ALERT_2_C | Low                                              | 'MainMol'          | Ueq             | as Compared to Neighbors of | Zr6  | Check       |
| PLAT242_ALERT_2_C | Low                                              | 'MainMol'          | Ueq             | as Compared to Neighbors of | N12  | Check       |
| PLAT242_ALERT_2_C | Low                                              | 'MainMol'          | Ueq             | as Compared to Neighbors of | N13  | Check       |
| PLAT242_ALERT_2_C | Low                                              | 'MainMol'          | Ueq             | as Compared to Neighbors of | N14  | Check       |
| PLAT242_ALERT_2_C | Low                                              | 'MainMol'          | Ueq             | as Compared to Neighbors of | C02L | Check       |
| PLAT242_ALERT_2_C | Low                                              | 'MainMol'          | Ueq             | as Compared to Neighbors of | C90  | Check       |
| PLAT242_ALERT_2_C | Low                                              | 'MainMol'          | Ueq             | as Compared to Neighbors of | C136 | Check       |
| PLAT242_ALERT_2_C | Low                                              | 'MainMol'          | Ueq             | as Compared to Neighbors of | Zr1  | Check       |
| PLAT242_ALERT_2_C | Low                                              | 'MainMol'          | Ueq             | as Compared to Neighbors of | Zr3  | Check       |
| PLAT242_ALERT_2_C | Low                                              | 'MainMol'          | Ueq             | as Compared to Neighbors of | N1   | Check       |
| PLAT242_ALERT_2_C | Low                                              | 'MainMol'          | Ueq             | as Compared to Neighbors of | N2   | Check       |
| PLAT242_ALERT_2_C | Low                                              | 'MainMol'          | Ueq             | as Compared to Neighbors of | N3   | Check       |
| PLAT242_ALERT_2_C | Low                                              | 'MainMol'          | Ueq             | as Compared to Neighbors of | C61  | Check       |
| PLAT242_ALERT_2_C | Low                                              | 'MainMol'          | Ueq             | as Compared to Neighbors of | C63  | Check       |
| PLAT242_ALERT_2_C | Low                                              | 'MainMol'          | Ueq             | as Compared to Neighbors of | C77  | Check       |
| PLAT242_ALERT_2_C | Low                                              | 'MainMol'          | Ueq             | as Compared to Neighbors of | C81  | Check       |
| PLAT243_ALERT_4_C | High                                             | 'Solvent'          | Ueq             | as Compared to Neighbors of | N18  | Check       |
| PLAT244_ALERT_4_C | Low                                              | 'Solvent'          | Ueq             | as Compared to Neighbors of | N15  | Check       |
| PLAT244_ALERT_4_C | Low                                              | 'Solvent'          | Ueq             | as Compared to Neighbors of | N16  | Check       |
| PLAT244_ALERT_4_C | Low                                              | 'Solvent'          | Ueq             | as Compared to Neighbors of | C160 | Check       |
| PLAT244_ALERT_4_C | Low                                              | 'Solvent'          | Ueq             | as Compared to Neighbors of | N17  | Check       |
| PLAT260_ALERT_2_C | Large                                            | Average            | Ueq             | of Residue Including        | 028  | 0.280 Check |
| PLAT260_ALERT_2_C | Large                                            | Average            | Ueq             | of Residue Including        | 0301 | 0.126 Check |
| PLAT260_ALERT_2_C | Large                                            | Average            | Ueq             | of Residue Including        | 021  | 0.246 Check |
| PLAT260_ALERT_2_C | Large                                            | Average            | Ueq             | of Residue Including        | 022  | 0.266 Check |
| PLAT260_ALERT_2_C | Large                                            | Average            | Ueq             | of Residue Including        | 023  | 0.279 Check |
| PLAT260_ALERT_2_C | Large                                            | Average            | Ueq             | of Residue Including        | 027  | 0.278 Check |
| PLAT309_ALERT_2_C | Single                                           | Bonded Oxygen      | (C-O > 1.3 Ang) | .....                       | 025  | Check       |
| PLAT309_ALERT_2_C | Single                                           | Bonded Oxygen      | (C-O > 1.3 Ang) | .....                       | 028  | Check       |
| PLAT317_ALERT_2_C | Too many H on C in C=N Moiety in Solvent/Ion ... |                    |                 |                             | C166 | Check       |
| PLAT332_ALERT_2_C | Large                                            | Phenyl C-C Range   | C50             | -C55                        | .    | 0.23 Ang.   |
| PLAT332_ALERT_2_C | Large                                            | Phenyl C-C Range   | C56             | -C61                        | .    | 0.21 Ang.   |
| PLAT369_ALERT_2_C | Long                                             | C(sp2)-C(sp2) Bond | C047            | - C167                      | .    | 1.55 Ang.   |
| PLAT369_ALERT_2_C | Long                                             | C(sp2)-C(sp2) Bond | C056            | - C05E                      | .    | 1.56 Ang.   |
| PLAT369_ALERT_2_C | Long                                             | C(sp2)-C(sp2) Bond | C108            | - C125                      | .    | 1.54 Ang.   |
| PLAT369_ALERT_2_C | Long                                             | C(sp2)-C(sp2) Bond | C128            | - C131                      | .    | 1.56 Ang.   |
| PLAT369_ALERT_2_C | Long                                             | C(sp2)-C(sp2) Bond | C136            | - C139                      | .    | 1.53 Ang.   |
| PLAT369_ALERT_2_C | Long                                             | C(sp2)-C(sp2) Bond | C146            | - C154                      | .    | 1.56 Ang.   |
| PLAT369_ALERT_2_C | Long                                             | C(sp2)-C(sp2) Bond | C6              | - C10                       | .    | 1.53 Ang.   |
| PLAT369_ALERT_2_C | Long                                             | C(sp2)-C(sp2) Bond | C26             | - C27                       | .    | 1.53 Ang.   |
| PLAT369_ALERT_2_C | Long                                             | C(sp2)-C(sp2) Bond | C28             | - C43                       | .    | 1.55 Ang.   |
| PLAT369_ALERT_2_C | Long                                             | C(sp2)-C(sp2) Bond | C62             | - C63                       | .    | 1.54 Ang.   |
| PLAT412_ALERT_2_C | Short                                            | Intra XH3 .. XHn   | H15G            | ..H15J                      | .    | 1.89 Ang.   |

|                   |                                                  |      |                       |              |
|-------------------|--------------------------------------------------|------|-----------------------|--------------|
| PLAT413_ALERT_2_C | Short Inter XH3 .. XHn                           | H02L | $x,y,z = \dots$       | 1_555 Check  |
|                   |                                                  |      | $\dots$               | 2.03 Ang.    |
|                   |                                                  |      | $1-x,1+y,1-z = \dots$ | 2_666 Check  |
| PLAT413_ALERT_2_C | Short Inter XH3 .. XHn                           | H13  | $\dots$               | 2.06 Ang.    |
|                   |                                                  |      | $x,y,z = \dots$       | 1_555 Check  |
| PLAT767_ALERT_4_C | INS Embedded LIST 6 Instruction Should be LIST 4 |      |                       | Please Check |
| PLAT790_ALERT_4_C | Centre of Gravity not Within Unit Cell: Resd. #  |      |                       | 1 Note       |
|                   | C168 H108 C14 Fe3 N12 O20 Zr6                    |      |                       |              |

---

[IMAGE] **Alert level G**

FORMU01\_ALERT\_1\_G There is a discrepancy between the atom counts in the  
 \_chemical\_formula\_sum and \_chemical\_formula\_moiety. This is  
 usually due to the moiety formula being in the wrong format.  
 Atom count from \_chemical\_formula\_sum: C360 H272 Cl10 Fe6 N32 O58 Zr  
 Atom count from \_chemical\_formula\_moiety: C180 H142 Cl5 Fe3 N16 O29 Zr6

PLAT002\_ALERT\_2\_G Number of Distance or Angle Restraints on AtSite 12 Note

PLAT003\_ALERT\_2\_G Number of Uiso or U(i,j) Restrained non-H-Atoms 219 Report

PLAT033\_ALERT\_4\_G Flack x Value Deviates > 3.0 \* Sigma from Zero . 0.449 Note

PLAT042\_ALERT\_1\_G Calc. and Reported MoietyFormula Strings Differ Please Check

Calc: C168 H108 Cl4 Fe3 N12 O20 Zr6, C168 H108 Cl2 F  
 e3 N12 O20 Zr6, 8(C3 H7 N O), 4(Cl), 10(O)

Rep.: C168 H114 N12 O20 Zr6 Fe3 Cl3, 4(C3 H7 N O), 5  
 (O), 2(Cl)

PLAT172\_ALERT\_4\_G The CIF-Embedded .res File Contains DFIX Records 13 Report

PLAT178\_ALERT\_4\_G The CIF-Embedded .res File Contains SIMU Records 1 Report

PLAT186\_ALERT\_4\_G The CIF-Embedded .res File Contains ISOR Records 1 Report

PLAT335\_ALERT\_2\_G Check Large C6 Ring C-C Range C87 -C92 0.16 Ang.

PLAT335\_ALERT\_2\_G Check Large C6 Ring C-C Range C43 -C48 0.15 Ang.

PLAT380\_ALERT\_4\_G Incorrectly? Oriented X(sp2)-Methyl Moiety ..... C155 Check

PLAT380\_ALERT\_4\_G Incorrectly? Oriented X(sp2)-Methyl Moiety ..... C157 Check

PLAT380\_ALERT\_4\_G Incorrectly? Oriented X(sp2)-Methyl Moiety ..... C164 Check

PLAT380\_ALERT\_4\_G Incorrectly? Oriented X(sp2)-Methyl Moiety ..... C166 Check

PLAT380\_ALERT\_4\_G Incorrectly? Oriented X(sp2)-Methyl Moiety ..... C158 Check

PLAT380\_ALERT\_4\_G Incorrectly? Oriented X(sp2)-Methyl Moiety ..... C159 Check

PLAT380\_ALERT\_4\_G Incorrectly? Oriented X(sp2)-Methyl Moiety ..... C161 Check

PLAT380\_ALERT\_4\_G Incorrectly? Oriented X(sp2)-Methyl Moiety ..... C162 Check

PLAT431\_ALERT\_2\_G Short Inter HL..A Contact Cl4 ..O2 . 3.06 Ang.

$x,y,z = \dots$  1\_555 Check

PLAT431\_ALERT\_2\_G Short Inter HL..A Contact Cl4 ..O14 . 3.07 Ang.

$1-x,-1+y,1-z = \dots$  2\_646 Check

PLAT431\_ALERT\_2\_G Short Inter HL..A Contact Cl5 ..O8 . 2.96 Ang.

$x,y,z = \dots$  1\_555 Check

PLAT431\_ALERT\_2\_G Short Inter HL..A Contact Cl5 ..O12 . 2.99 Ang.

$1-x,-1+y,1-z = \dots$  2\_646 Check

PLAT432\_ALERT\_2\_G Short Inter X...Y Contact Cl2 ..C157 . 2.91 Ang.

$1/2-x,1/2+y,1-z = \dots$  4\_556 Check

PLAT606\_ALERT\_4\_G Solvent Accessible VOID(S) in Structure ..... ! Info

PLAT720\_ALERT\_4\_G Number of Unusual/Non-Standard Labels ..... 26 Note

|      |      |      |      |      |      |      |      |
|------|------|------|------|------|------|------|------|
| C01W | H01W | C028 | H028 | C02L | H02L | C02U | H02U |
| C03P | H03P | C03S | H03S | C03W | H03W | C047 | H047 |
| C04F | H04F | C04T | H04T | C056 | H056 | C05E | H05E |
| C05G | H05G |      |      |      |      |      |      |

PLAT790\_ALERT\_4\_G Centre of Gravity not Within Unit Cell: Resd. # 5 Note

C3 H7 N O

PLAT790\_ALERT\_4\_G Centre of Gravity not Within Unit Cell: Resd. # 9 Note

O

|                   |                                                  |       |             |           |
|-------------------|--------------------------------------------------|-------|-------------|-----------|
| PLAT790_ALERT_4_G | Centre of Gravity not Within Unit Cell: Resd.    | #     | 10          | Note      |
| 0                 |                                                  |       |             |           |
| PLAT790_ALERT_4_G | Centre of Gravity not Within Unit Cell: Resd.    | #     | 11          | Note      |
| 0                 |                                                  |       |             |           |
| PLAT790_ALERT_4_G | Centre of Gravity not Within Unit Cell: Resd.    | #     | 12          | Note      |
| 0                 |                                                  |       |             |           |
| PLAT794_ALERT_5_G | Tentative Bond Valency for Zr1                   | (IV)  | .           | 4.27 Info |
| PLAT794_ALERT_5_G | Tentative Bond Valency for Zr2                   | (IV)  | .           | 4.26 Info |
| PLAT794_ALERT_5_G | Tentative Bond Valency for Zr3                   | (IV)  | .           | 3.94 Info |
| PLAT794_ALERT_5_G | Tentative Bond Valency for Zr4                   | (IV)  | .           | 3.92 Info |
| PLAT794_ALERT_5_G | Tentative Bond Valency for Zr5                   | (IV)  | .           | 4.45 Info |
| PLAT794_ALERT_5_G | Tentative Bond Valency for Zr6                   | (IV)  | .           | 3.94 Info |
| PLAT794_ALERT_5_G | Tentative Bond Valency for Fe1                   | (II)  | .           | 1.98 Info |
| PLAT794_ALERT_5_G | Tentative Bond Valency for Fe2                   | (II)  | .           | 2.35 Info |
| PLAT794_ALERT_5_G | Tentative Bond Valency for Fe3                   | (III) | .           | 2.79 Info |
| PLAT794_ALERT_5_G | Tentative Bond Valency for Fe4                   | (III) | .           | 3.19 Info |
| PLAT802_ALERT_4_G | CIF Input Record(s) with more than 80 Characters |       | 1           | Info      |
| PLAT860_ALERT_3_G | Number of Least-Squares Restraints .....         |       | 1424        | Note      |
| PLAT869_ALERT_4_G | ALERTS Related to the Use of SQUEEZE Suppressed  |       | !           | Info      |
| PLAT883_ALERT_1_G | Absent Datum for _atom_sites_solution_primary .. |       | Please Do ! |           |
| PLAT899_ALERT_4_G | SHELXL2018 is Outdated and Succeeded by SHELXL   |       | 2019/3      | Note      |

---

0 **ALERT level A** = Most likely a serious problem - resolve or explain  
 20 **ALERT level B** = A potentially serious problem, consider carefully  
 79 **ALERT level C** = Check. Ensure it is not caused by an omission or oversight  
 45 **ALERT level G** = General information/check it is not something unexpected

5 ALERT type 1 CIF construction/syntax error, inconsistent or missing data  
 96 ALERT type 2 Indicator that the structure model may be wrong or deficient  
 3 ALERT type 3 Indicator that the structure quality may be low  
 30 ALERT type 4 Improvement, methodology, query or suggestion  
 10 ALERT type 5 Informative message, check

---



---

It is advisable to attempt to resolve as many as possible of the alerts in all categories. Often the minor alerts point to easily fixed oversights, errors and omissions in your CIF or refinement strategy, so attention to these fine details can be worthwhile. In order to resolve some of the more serious problems it may be necessary to carry out additional measurements or structure refinements. However, the purpose of your study may justify the reported deviations and the more serious of these should normally be commented upon in the discussion or experimental section of a paper or in the "special\_details" fields of the CIF. checkCIF was carefully designed to identify outliers and unusual parameters, but every test has its limitations and alerts that are not important in a particular case may appear. Conversely, the absence of alerts does not guarantee there are no aspects of the results needing attention. It is up to the individual to critically assess their own results and, if necessary, seek expert advice.

### **Publication of your CIF in IUCr journals**

A basic structural check has been run on your CIF. These basic checks will be run on all CIFs submitted for publication in IUCr journals (*Acta Crystallographica*, *Journal of Applied Crystallography*, *Journal of Synchrotron Radiation*); however, if you intend to submit to *Acta Crystallographica Section C* or *E* or *IUCrData*, you should make sure that full publication checks are run on the final version of your CIF prior to submission.

### **Publication of your CIF in other journals**

Please refer to the *Notes for Authors* of the relevant journal for any special instructions relating to CIF submission.

Datablock 1\_c - ellipsoid plot

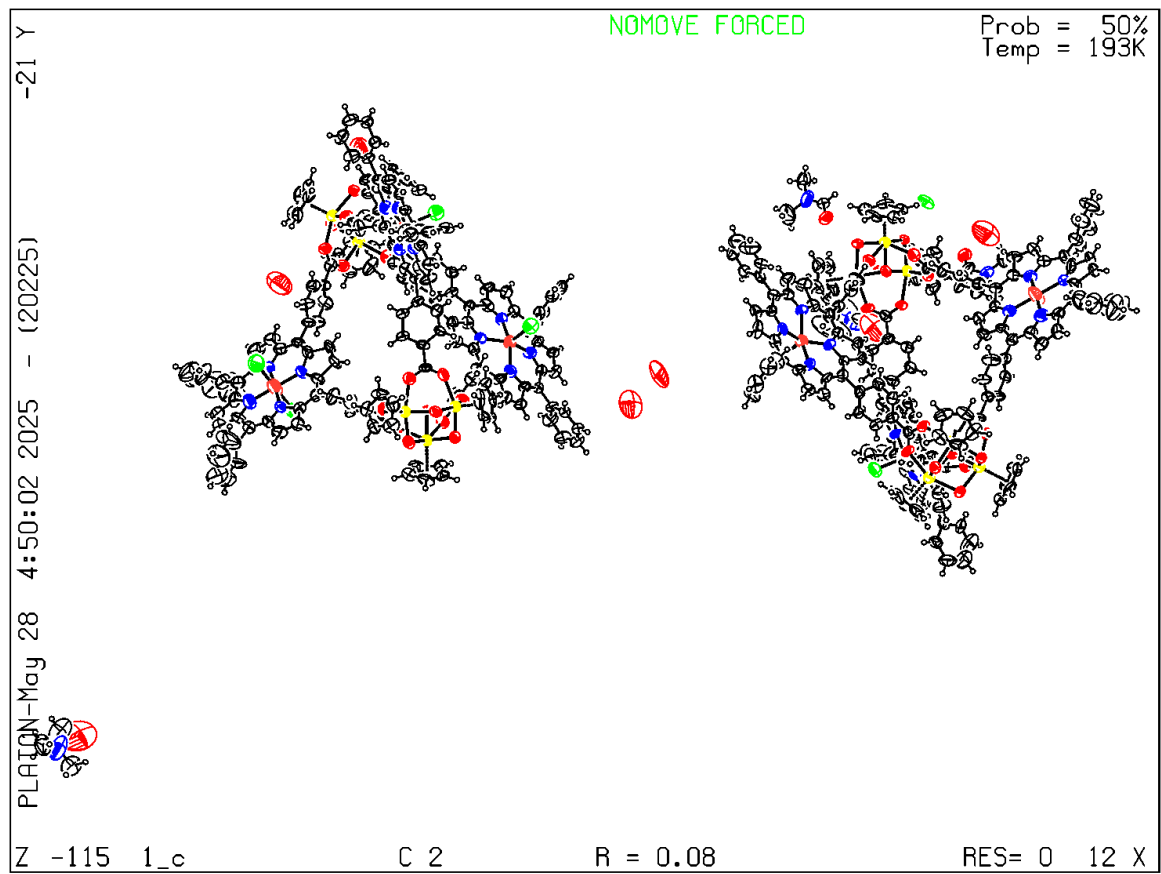

Supplement: Supplementary file 1 [file 4ba6a45aa83eac215b2de2db.pdf]
