# Supplementary material for: Merging bioinspired incubation with supramolecular photocatalysis for Michaelis CO2 reduction beyond enzymes
Source: Research Square preprint supplement (doi:10.21203/rs.3.rs-8521926/v1), 2026-01-16
Supplement: Supplementary file 1 [file 2d55d551c18e07d4d8cbce1b.docx]

Supporting Information for

**Merging bioinspired incubation with supramolecular photocatalysis for Michaelis CO2 reduction beyond enzymes**

Xin Xu, Junkai Cai,* Qiaojia Guo, Peng Wang, and Chunying Duan*

State Key Laboratory of Coordination Chemistry, Nanjing University, Nanjing 210023, People’s Republic of China.

*Corresponding Authors. Email: jkcai@nju.edu.cn; cyduan@dlut.edu.cn.

**Table of Contents**

[1. General Methods and Syntheses 3](#_Toc13011)

[1.1 Reagents and Materials 3](#_Toc27695)

[1.2 Experimental instruments 3](#_Toc245)

[1.3 Experimental conditions and test methods 4](#_Toc22657)

[1.4 Experimental parameter computational formulas 5](#_Toc18164)

[1.5 Syntheses 6](#_Toc14406)

[2. Single-crystal X-ray crystallography 10](#_Toc6777)

[3. 1H NMR Spectra 21](#_Toc19673)

[4. ESI-MS Spectra 27](#_Toc30850)

[5. Fluorescence spectra 32](#_Toc1050)

[6. UV−vis Spectra 46](#_Toc28867)

[7. Electrochemical Measurements 53](#_Toc2790)

[8. Photocatalytic Studies 60](#_Toc12500)

[8.1 Photocatalytic CO2 reduction 60](#_Toc25588)

[8.2 Photocatalytic oxidative cyclization: General procedure and product characterization 91](#_Toc5642)

[9. Supplementary References 115](#_Toc11991)

# 1. General Methods and Syntheses

## 1.1 Reagents and Materials

All reagents were purchased and used directly without further purification unless otherwise specified. 1,3-Dimethyl-2-phenyl-2,3-dihydro-1*H*-benzimidazole (BIH, 97.0%), tris(2-phenylpyridine)iridium (III) (Ir(ppy)3, 98.0%), 2,2,2-trifluoroethanol, pyrrole (99.0%), benzaldehyde (99.0%) were all purchased from Energy Chemical Co., Ltd.. Methyl *p*-formylbenzoate (98.0%) was purchased from Bide Pharmatech Co., Ltd, bis(cyclo-pentadienyl) zirconium dichloride (98.0%) was purchased from Accela ChemBio Co., Ltd., hydrochloric acid (37.0%) and KOH (≥85.0%) were purchased from Sinopharm Chemical Reagent Co., Ltd., and iron(II) chloride tetrahydrate (FeCl2·4H2O, 98.0%) was purchased from Alfa Aesar Co., Ltd.. Propionic acid (≥99.5%), trichloromethane (99.0%), methanol (≥99.5%), ethanol (≥99.7%), diethyl ether (99.5%), and petroleum ether (99.5%) were all purchased from Nanjing Chemical Reagent Co., Ltd.. Tetrahydrofuran (THF, 99.9%), *N*, *N*-dimethylformamide (DMF, >99.5%), dichloromethane (99.9%), 1,3,5-trimethoxybenzene (98.0%), *o*-phenylenediamine (98.0%), 2-aminophenol (99.0%), 2-aminothiophenol (97.0%), acetonitrile (AR, ≥99.9%), 4-fluoro-benzaldehyde (98.0%), 4-chlorobenzaldehyde (97.0%), 4-(*tert*-butyl)benzaldehyde (97.0%), 4-methoxybenzaldehyde (99.0%), and 4-methylbenzaldehyde (98.0%) were purchased from Energy Chemical Co., Ltd.. CO2 and Ar were purchased from Nanjing Special Gas Factory Co., Ltd.

## 1.2 Experimental instruments

The crystal data were collected on the Bruker D8 Venture X-ray diffractometer in Bruker AXS, Germany. The fluorescence spectra were measured on the Horiba FL-3 fluorescence spectrophotometer at room temperature. The fluorescence lifetimes were measured employing time correlated single photon counting on an Edinburgh FLS1000 instrument. Ultraviolet−visible (UV−vis) data were collected by Shimadzu UV3600 spectrometer. A typical three-electrode system was used to collect electrochemical data on CHI 760F electrochemical workstation. Nuclear magnetic resonance (NMR) data were obtained on Bruker Avance Ⅲ 400M spectrometer, and the peak frequency was based on the internal standard (tetramethylsilane, TMS) shift of 0.0 ppm. Electrospray ionization mass (ESI-MS) spectra were obtained by Thermo Fisher Q Exactive mass spectrometer, and methanol or acetonitrile was used as the mobile phase with a flow rate of 0.20 mL·min−1. The gas chromatography data were obtained by Techcomp GC 7900 gas chromatograph. In situ FTIR experiments were conducted on a Nicolet IS50-FTIR spectrometer (Thermo Scientific) equipped with a mercury cadmium telluride detector and a custom-designed gas-tight reaction cell. Isotopically labeled reaction products were analyzed by gas chromatography-mass spectrometry (GC-MS, QP2020N, Shimadzu Corporation) equipped with a high-sensitivity quadrupole mass analyzer. The continuous-flow photoreactor system was engineered with technical support from Beijing Roger Tech, Ltd., featuring an integrated helical microfluidic module constructed from fluorinated ethylene propylene (FEP) tubing (standard *o.d.* 1.6 mm, *i.d.* 0.8 mm; residence volume: 8 mL).

## 1.3 Experimental conditions and test methods

**General method of UV**−**vis absorption spectra and fluorescence spectra tests**

UV−vis and fluorescence spectra were acquired in custom 1.0 cm × 1.0 cm quartz cuvettes sealed with a septum. The sample solution was saturated by bubbling with CO2 or Ar for 10 min to rigorously exclude oxygen. A micro stir bar was placed inside the cuvette prior to measurements, followed by the addition of analytes via microsyringe.

**General method of electrochemical measurements**

Electrochemical measurements were performed in a standard three-electrode cell comprising a glassy carbon working electrode, an Ag/AgCl reference electrode (3.0 M KCl), and a Pt silk counter electrode (0.5 mm diameter). Prior to each measurement, the working electrode was thoroughly polished with 0.05 μm alumina powder on a polishing cloth. The electrolyte was a freshly prepared 0.10 M solution of TBAPF6 in anhydrous DMF or CH3CN, which was saturated by bubbling with CO2 or Ar for 10 min. Gas flow was maintained throughout experiments, with bubbling between scans and solvent blanketing during scans. All cyclic voltammograms were recorded at a scan rate of 100 mV/s unless otherwise stated.

**General method of gas phase test**

Gas-phase analysis was performed using a Techcomp GC 7900 gas chromatograph to quantify carbon monoxide (CO) generated from the photocatalytic reduction of carbon dioxide (CO2) in the photoreactor headspace. The system employed nitrogen as the carrier gas and a 0.6 m × 3.0 mm (i.d.) 5 Å molecular sieve column for separation. Hydrogen (H2) was detected via a thermal conductivity detector (TCD) operated at 100℃, while CO and hydrocarbons were analyzed using a flame ionization detector (FID) coupled with a methane conversion unit. The injector port and chromatographic oven temperatures were maintained at 200℃ and 60℃, respectively.

**In situ FTIR spectra experiment**

The catalyst was uniformly dispersed as a thin film on a substrate mounted at the focal point of the reaction chamber. Prior to initiating catalysis, the system underwent rigorous purging with high-purity N2 (30 mL·min−1) to eliminate the gases in the cell and the adsorbed species on catalyst surface. Subsequently, a continuous CO2 stream (99.999%) was introduced to establish a well-defined CO2-dominated reactive atmosphere. Dynamic surface processes and transient intermediates were probed in real time by synchronizing mercury cadmium telluride detector-based time-resolved spectral acquisition with controlled photoexcitation conditions during photocatalytic reduction.

## 1.4 Experimental parameter computational formulas

Turnover number, turnover frequency, and product selectivity were calculated as follows:

Where and represent the molar amounts of the target product and catalyst, respectively.

*TON* represents turnover frequency, *TON* represents the turnover number, *t* represents the time of reactions.

Where is the molar amount of the desired product, and corresponds to the total molar amount of all products.

TON and TOFmax were determined under optimal conditions as follows:

(*Note: Gas volume converted to moles via standard molar volume at STP; catalyst concentration scaled to total moles in 5 mL volume*)

(*Peak rate derived from initial 10-min activity; units standardized to h−1*)

## 1.5 Syntheses

**Supplementary Scheme 1.** The synthetic route of porphyrin ligand precursor compound **2**.

**Synthesis of compound 1**

Compound **1** was prepared via a modified literature procedure.[1] Under argon atmosphere, concentrated HCl (37.0%, 1.0 mL) was diluted in deionized water (112 mL), followed by the addition of distilled pyrrole (5.2 mL, 75.0 mmol) with vigorous stirring until a homogeneous solution formed. Benzaldehyde (2.6 mL, 25.0 mmol) was introduced dropwise over 10 min, and the reaction mixture was stirred at ambient temperature for 6 h. The resulting precipitate was isolated by vacuum filtration, washed extensively with deionized water (3 × 50 mL), and dried under reduced pressure. Purification via silica gel column chromatography (eluent: 1:1 petroleum ether/ dichloromethane) yielded compound **1** as a yellow solid (2.87 g, 51.7%). 1H NMR (400 MHz, CDCl3, ppm): *δ* 7.86 (s, 2H), 7.35–7.16 (m, 5H), 6.66 (q, *J* = 2.6 Hz, 2H), 6.14 (q, *J* = 2.8 Hz, 2H), 6.00–5.76 (m, 2H), 5.44 (s, 1H).

**Synthesis of compound 2**

Compound **1** (3.0 g, 13.5 mmol) was dissolved in propionic acid (100 mL). Methyl 4-formylbenzoate (2.2 g, 13.5 mmol) was added, and the reaction mixture was heated at 140°C for 2 h. After cooling to room temperature, the solvent was removed in vacuo. The crude product was washed with sat. aq. K2CO3 (3 × 50 mL) and brine (3 × 50 mL). The resulting solid was dissolved in CH2Cl2 and purified by flash column chromatography on silica gel to afford compound **2** as a purple solid (0.53 g, 10.7%). 1H NMR (400 MHz, CDCl3, ppm): *δ* 8.89–8.83 (m, 4H), 8.82–8.76 (m, 4H), 8.44 (d, *J* = 8.2 Hz, 4H), 8.30 (d, *J* = 8.2 Hz, 4H), 8.21 (d, *J* = 7.8 Hz, 4H), 7.76 (q, *J* = 7.2, 6.3 Hz, 6H), 4.11 (s, 6H), −2.79 (s, 2H). ESI-MS: calculated for C48H35N4O4 [**2** + H]+, *m/z* = 731.27, found: 731.27.

**Supplementary Scheme 2.** The synthetic route of iron porphyrin ligand **LFe**.

**Synthesis of compound LH**

Compound **2** (1.0 g, 1.37 mmol) was dissolved in a mixture of tetrahydrofuran and methanol (50 mL each). Aqueous KOH solution (40%, 40 mL) was added, and the reaction mixture was stirred at 90°C for 20 h. After cooling to room temperature, the solution was acidified to pH 3 with concentrated HCl, followed by addition of deionized water (100 mL). The aqueous layer was separated and extracted with chloroform (3 × 100 mL). The solvent was evaporated under reduced pressure to obtain purple solid product **LH** with a yield of 32.3%. 1H NMR (400 MHz, DMSO-*d6*, ppm): *δ* 13.31 (s, 2H), 8.85 (s, 8H), 8.37 (q, *J* = 8.2 Hz, 8H), 8.23 (dd, *J* = 7.3, 1.7 Hz, 4H), 7.84 (q, *J* = 5.4 Hz, 6H), −2.93 (s, 2H). ESI-MS: calculated for C46H29N4O4 [**LH** − H]−, *m/z* = 701.22, found: 701.22.

**Synthesis of ligand** **LFe**

Compound **LH** (0.17 g, 0.24 mmol) and FeCl2·4H2O (0.48 g, 2.4 mmol) were dissolved in DMF (80 mL). The reaction mixture was heated at 130°C for 12 h under nitrogen atmosphere. After cooling to room temperature, the solvent was removed in vacuo. The crude product was washed with warm water (50°C) until the filtrate was colorless and dried in vacuo. The resulting purple solid was dissolved in methanol, filtered, and concentrated in vacuo to afford **LFe** as a purple solid (0.15 g, 78.3%). ESI-MS: calculated for C46H27ClFeN4O4 [**LFe** − H]−, *m/z* = 790.11, found: 790.11.

**Synthesis of metal-organic capsule** **H1**

Cp2ZrCl2 (0.04 mmol, 11.7 mg) was dissolved in H2O (0.3 mL) under ultrasonic-cation for 10 min. To this solution was added a mixture of ligand **LFe** (0.02 mmol, 15.9 mg) in DMF (2.0 mL) and THF (1.0 mL). After additional ultrasonication (10 min), the reaction mixture was heated at 65°C for 12 h. Upon cooling to room temperature, the product was washed with DMF, affording purple block-shaped crystals **H1**. The crystals were subsequently washed with Et2O and dried in vacuo for a yield of 60.6%. ESI-MS: calculated forC168H115N12O20Zr6Fe3Cl3 [**H1**]2+, *m/z* = 1720.4902, found: 1720.4905.

**Synthesis of substrate 1a and 3a**

**Supplementary Scheme 3.** The synthetic route of substrate **1a** and **3a**.

Substrates for C–N coupling **1a** and C–O coupling **3a** were prepared using a similar method. In a 10 mL Schlenk flask purged with argon, *o*-phenylenediamine or 2-aminophenol (0.40 g, 3.70 mmol) was dissolved in anhydrous ethanol (4.0 mL) at 50°C. To this solution, benzaldehyde (0.20 g, 1.85 mmol) in ethanol (1.0 mL) was added dropwise with maintained heating. After stirring at 0°C for 1 h, the reaction mixture was warmed to ambient temperature. Purification by column chromatography on basic alumina with a hexane/ethyl acetate gradient eluent afforded **1a** (0.25 g, 68.9%) as a yellow oil and **3a** (0.30 g, 82.3%) as colorless crystals.

**Synthesis of substrate 1b**−**1f**

**Supplementary Scheme 4.** The synthetic route of substrate **1b**−**1f**.

Imine derivatives **1b**−**1f** were synthesized under green conditions using water as the sole solvent. Reactions were conducted in 50 mL round-bottom flasks charged with aldehyde (2.0 mmol), benzene-1,2-diamine (2.0 mmol, 0.23 g), and thiourea (0.29 mmol, 0.02 g) dissolved in deionized water (10 mL). The mixtures were sonicated in an ultrasonic bath at 60°C for optimized durations, with reaction progress monitored by thin-layer chromatography (TLC) using ethyl acetate/hexane (3:7 v/v) as the eluent system. Upon completion, sonication was terminated and the mixture was diluted with additional deionized water (10 mL). Subsequent stirring at ambient temperature for 5 min induced product precipitation, followed by isolation via filtration. The solid products were washed repeatedly with deionized water to remove residual reactants and dried thoroughly. This solvent-free protocol afforded target compounds **1b**−**1f** as yellow solids in isolated yields exceeding 90%.

#

# 2. Single-crystal X-ray crystallography

X-ray single crystal diffraction data were collected on a Bruker D8 Venture CCD diffractometer. The available data were collected and integrated by the program APEX4, and the intensity data were corrected by *Lp* factor and empirical absorption. The structure was solved by the direct method of SHELXTL *version5.1* and refined by full-matrix least-squares refinement on *F2* using SHELXL-2018/3.

Single-crystal X-ray analysis of **H1** revealed dark purple rhomboidal blocks crystallizing in the *monoclinic* system. In the structural refinement of **H1**, all the non-hydrogen atoms were refined anisotropically. Hydrogen atoms within the ligand backbones, two DMF molecules were fixed geometrically at calculated distances and allowed to ride on the parent non-hydrogen atoms. To assist the stability of refinements, carbon, nitrogen, and oxygen atoms were restrained to be similar. In addition, the SQUEEZE subroutine in PLATON was used for refinements.[2] Hydrogen atoms were placed in calculated positions and refined using a riding model. Full crystallographic parameters are provided in **Supplementary Table 1**.

**Supplementary Fig. 1.** An ORTEP plot of the coordination capsule **H1**, showing 30% probability displacement ellipsoids of non-hydrogen atoms. Hydrogen atoms, anions and solvents are omitted for clarity. Symmetry code: 11-x, +y, 1-z; 21-x, +y, 2-z.


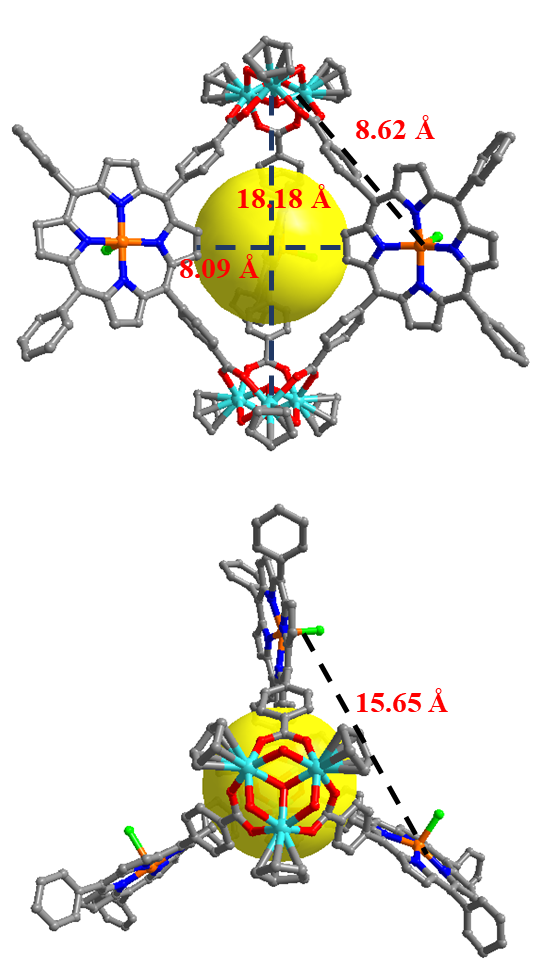


**Supplementary Fig. 2.** The structure of **H1** displays the geometric shape of zirconium ion coordination and its potential pocket cavity (Zr cyan, Fe orange, Cl green, C gray, N blue, and O red).

**Supplementary Fig. 3.** The coordination configuration of iron core, showing 30% probability displacement ellipsoids of atoms. Selected bond distances (Å) and angles (°): Fe2-N4 2.014(13), Fe2-N5 2.098(11), Fe2-N6 2.107(13), Fe2-N7 2.113(10), Fe2-Cl1 2.229(5), N4-Fe2-Cl1 101.6(4), N5-Fe2-Cl1 103.4(4), N6-Fe2-Cl1 107.9(4), N7-Fe2-Cl1 102.5(4).

**Supplementary Fig. 4.** The coordination configuration of the Zr-oxo cluster, showing 30% probability displacement ellipsoids of atoms. Selected bond distances (Å) and angles (°): Zr4-O11 2.109(9), Zr4-O13 2.176(10), Zr4-O14 2.115(12), Zr4-O15 2.218(10), Zr4-O192 2.198(11), O11-Zr4-O13 71.9(4), O11-Zr4-O14 73.4(4), O11-Zr4-O15 81.5(4), O11-Zr4-O192 78.5(4), O11-Zr4-Zr5 35.7(3), O11-Zr4-Zr6 37.3(2), O13-Zr4-Zr5 36.7(3), O13-Zr4-Zr6 85.2(3), O192-Zr4-Zr5 75.9(3), O192-Zr4-Zr6 114.3(3), Zr5-Zr4-Zr6 59.98(4). Symmetry code: 11-x, +y, 1-z; 21-x, +y, 2-z.


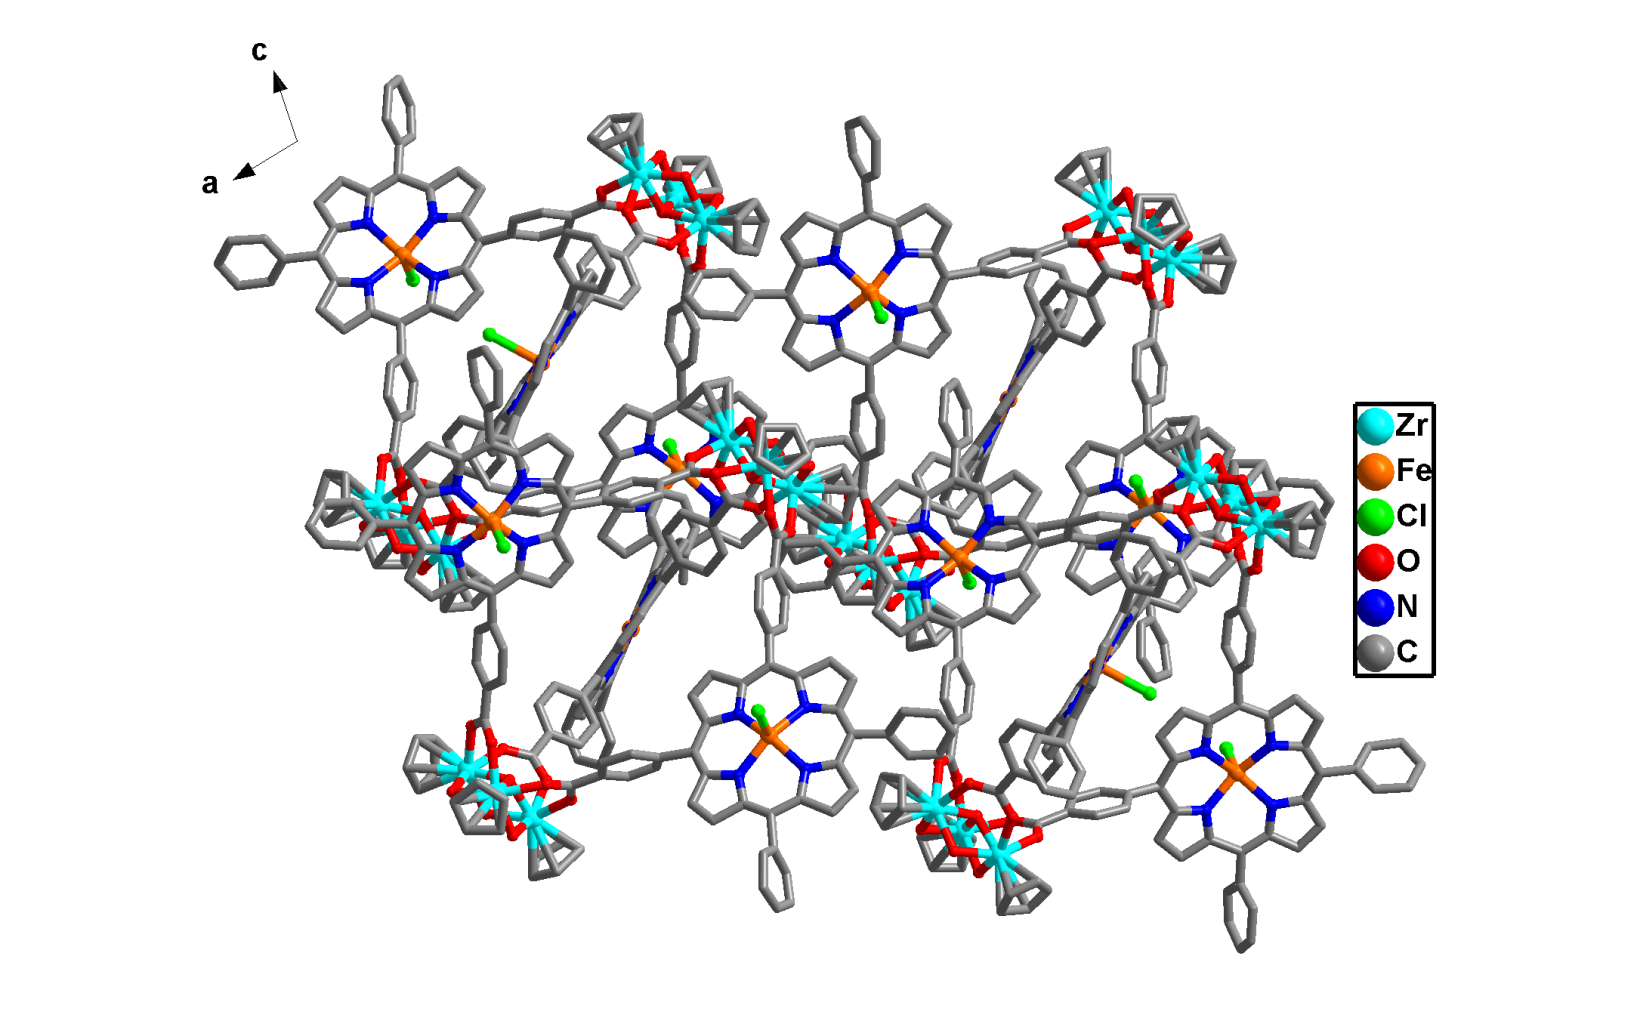


**Supplementary Fig. 5.** Crystal packing model of capsule **H1** with counterions viewed from the *b*-axis. Hydrogen atoms and solvent molecules were omitted for clarity.


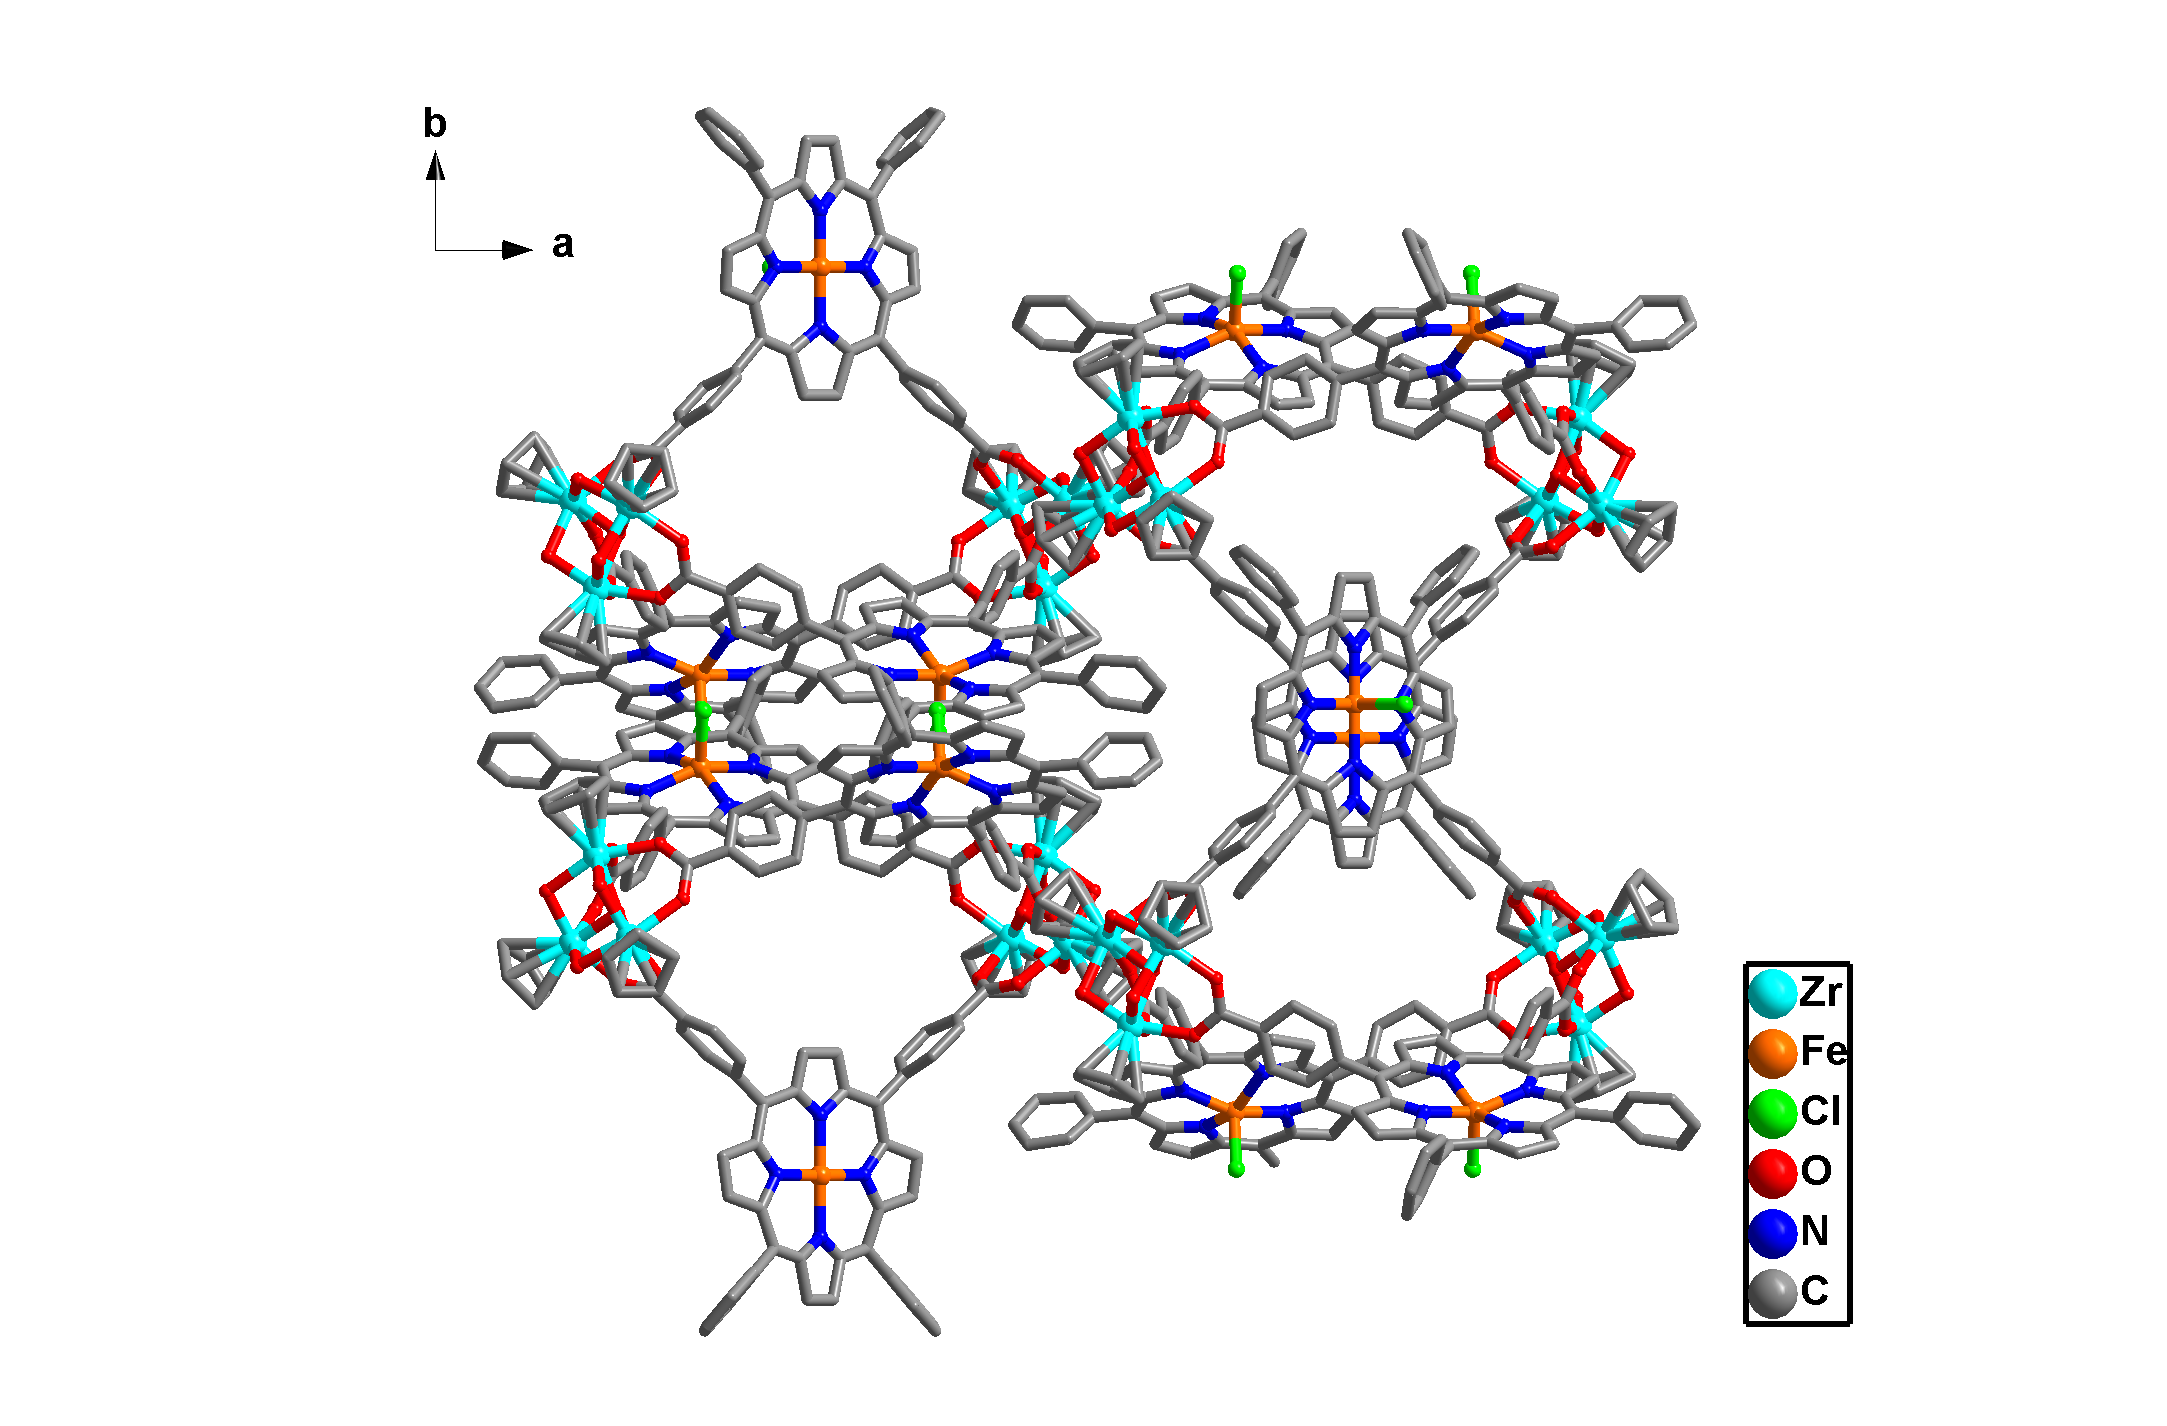


**Supplementary Fig. 6.** Crystal packing model of capsule **H1** with counterions viewed from the *c*-axis. Hydrogen atoms and solvent molecules were omitted for clarity.

**Supplementary Table 1.** Crystal data and structure refinement details of **H1**

| **Compound** | **H1** |
| --- | --- |
| CCDC number | 2454987 |
| Formula | C168H115N12O20Zr6Fe3Cl3 |
| formula weight, fw | 7758.32 |
| Temperature, *T* [K] | 193(2) |
| crystal system | *monoclinic* |
| space group | *C2(5)* |
| a [Å] | 37.098(2) |
| b [Å] | 29.5954(16) |
| c [Å] | 23.5807(13) |
| α [o] | 90 |
| β [o] | 102.756(3) |
| γ [o] | 90 |
| V [Å3] | 25251(2) |
| Z | 2 |
| ρ [g cm−3] | 1.020 |
| μ [mm−1] | 4.196 |
| θ range | 1.921 − 68.423 |
| F(000) | 7852 |
| Radiation | CuKα (λ = 1.54178) |
| Crystal size / mm3 | 0.25 × 0.23 × 0.21 |
| Index ranges | −44 ≤ h ≤ 38, −35 ≤ k ≤ 35, −28 ≤ l ≤ 28 |
| Independent reflections | 45636 [Rint = 0.0683, Rsigma = 0.0752] |
| Data/restraints/parameters | 45636/1424/2131 |
| goodness-of-fit, GOF | 0.983 |
| *R*1*a* [I> 2σ (I)] | 0.0754 |
| wR2 (all data) | 0.2253 |

*aR1 = ||Fo| – |Fc||/|Fo|. bwR2 =* [ *w*(*|Fo2| – |Fc2|2*)*/w|Fo2|2*]*1/2.*

**Supplementary Table 2.** Selected bond lengths [Å] for **H1**

| Bond | Length [Å] | Bond | Length [Å] |
| --- | --- | --- | --- |
| Zr1-O1 | 2.041(11) | Zr3-O7 | 2.193(9) |
| Zr1-O2 | 2.073(10) | Zr3-C11 | 2.596(16) |
| Zr1-O3 | 2.188(11) | Zr3-C12 | 2.524(13) |
| Zr1-O8 | 2.164(8) | Zr3-C13 | 2.549(17) |
| Zr1-O91 | 2.242(9) | Zr3-C14 | 2.484(18) |
| Zr1-C1 | 2.493(16) | Zr3-C15 | 2.556(18) |
| Zr1-C2 | 2.486(17) | Zr4-O11 | 2.109(9) |
| Zr1-C3 | 2.565(19) | Zr4-O192 | 2.198(11) |
| Zr1-C4 | 2.498(14) | N5-C32 | 1.333(19) |
| Zr1-C5 | 2.467(14) | N3-C771 | 1.343(19) |
| Zr1-Zr3 | 3.3473(19) | O17-C86 | 1.274(18) |
| Zr1-Zr2 | 3.351(2) | N10-C109 | 1.328(18) |
| Zr2-O1 | 2.050(11) | O3-C62 | 1.240(19) |
| Zr2-O4 | 2.217(11) | Fe1-N1 | 2.08(2) |
| Zr2 O5 | 2.190(10) | Fe1-N21 | 1.998(15) |
| Zr2-O7 | 2.070(10) | Fe1-N3 | 2.04(2) |
| Zr2-O8 | 2.123(10) | Fe2-Cl1 | 2.229(5) |
| Zr2-C6 | 2.501(13) | Fe2-N4 | 2.014(13) |
| Zr2-C7 | 2.479(15) | Fe2-N5 | 2.098(11) |
| Zr2-C8 | 2.524(17) | Fe2-N6 | 2.107(13) |
| Zr2-C9 | 2.572(16) | Fe2-N7 | 2.113(10) |
| Zr2-C101 | 2.551(18) | Fe3-Cl2 | 2.218(6) |
| Zr2-Zr3 | 3.346(2) | Fe3-N8 | 2.077(14) |
| Zr3-O1 | 2.113(10) | Fe3-N9 | 2.010(13) |
| Zr3-O2 | 2.155(10) | Fe3-N10 | 2.104(12) |
| Zr3-O6 | 2.156(10) | Fe3-N11 | 2.038(11) |

Symmetry code: 11-x, +y, 1-z; 21-x, +y, 2-z.**Supplementary Table 3.** Selected bond angles [°] for **H1**

| Bond | Bond Angles [°] | Bond | Bond Angles [°] |
| --- | --- | --- | --- |
| Zr3-Zr1-Zr2 | 59.93(4) | O101-Zr3-O7 | 153.0(4) |
| O8-Zr1-O3 | 84.3(4) | O1-Zr3-O7 | 72.1(4) |
| O8-Zr1-Zr2 | 38.1(3) | O1-Zr3-O6 | 79.9(4) |
| O8-Zr1-Zr3 | 87.0(2) | O1-Zr3-O101 | 81.5(4) |
| O8-Zr1-O91 | 152.4(4) | O1-Zr3-O2 | 71.6(4) |
| O3-Zr1-O91 | 85.6(4) | O2-Zr3-O7 | 91.6(4) |
| O91-Zr1-C1 | 74.8(6) | O2-Zr3-O6 | 150.6(4) |
| O1-Zr1-O8 | 72.8(4) | O2-Zr3-O101 | 85.0(4) |
| O1-Zr1-O2 | 74.7(4) | N10-Fe3-Cl2 | 103.0(4) |
| O1-Zr1-O3 | 80.3(4) | N8-Fe3-Cl2 | 103.8(4) |
| O1-Zr1-O91 | 80.3(4) | N8-Fe3-N10 | 153.2(5) |
| O2-Zr1-O8 | 93.4(4) | N11-Fe3-Cl2 | 103.4(4) |
| O2-Zr1-O3 | 154.5(4) | N11-Fe3-N10 | 86.6(5) |
| O2-Zr1-C1 | 110.5(7) | N11-Fe3-N8 | 87.4(5) |
| O2-Zr1-C2 | 78.1(5) | N5-Fe2-Cl1 | 103.4(4) |
| O7-Zr2-O8 | 93.6(4) | N5-Fe2-N7 | 154.0(6) |
| O7-Zr2-O5 | 87.4(4) | N5-Fe2-N6 | 85.7(5) |
| O7-Zr2-O4 | 155.6(4) | N7-Fe2-Cl1 | 102.5(4) |
| O1-Zr2-O7 | 75.9(4) | N4-Fe2-Cl1 | 101.6(4) |
| O1-Zr2-O8 | 73.5(4) | N21-Fe1-N3 | 89.0(5) |
| O1-Zr2-O5 | 81.2(4) | N2-Fe1-N3 | 89.0(5) |
| O1-Zr2-O4 | 79.9(4) | N21-Fe1-N1 | 91.0(5) |
| O5-Zr2-O4 | 85.6(4) | N2-Fe1-N21 | 178.0(10) |
| O101-Zr3-O7 | 153.0(4) | N122-Fe4-Cl32 | 89.1(5) |
| O6-Zr3-O7 | 86.4(4) | N122-Fe4-N14 | 89.9(4) |
| O6-Zr3-O101 | 83.7(4) | N13-Fe4-Cl32 | 90.38(17) |

Symmetry code: 11-x, +y, 1-z; 21-x, +y, 2-z.

**The DFT computation**

All geometry optimizations were performed with the Gaussian 16 software, employing density functional theory (DFT) at the B3LYP/6-31G*(D3BJ) level in the gas phase. Initial binding modes for the host-guest complexes were explored with AutoDock 4.2.6, and the resulting structures underwent a final optimization at the same level of theory.


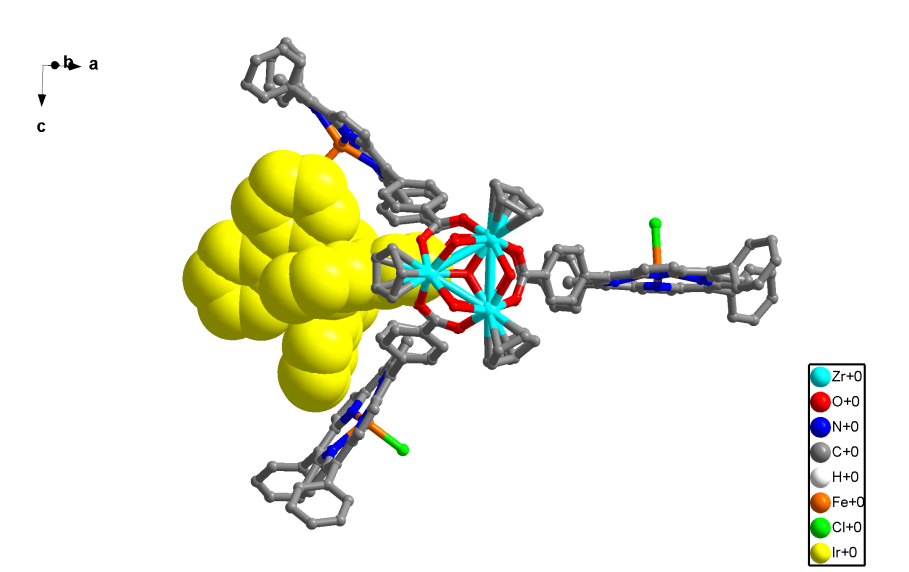

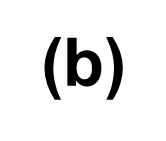

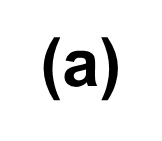

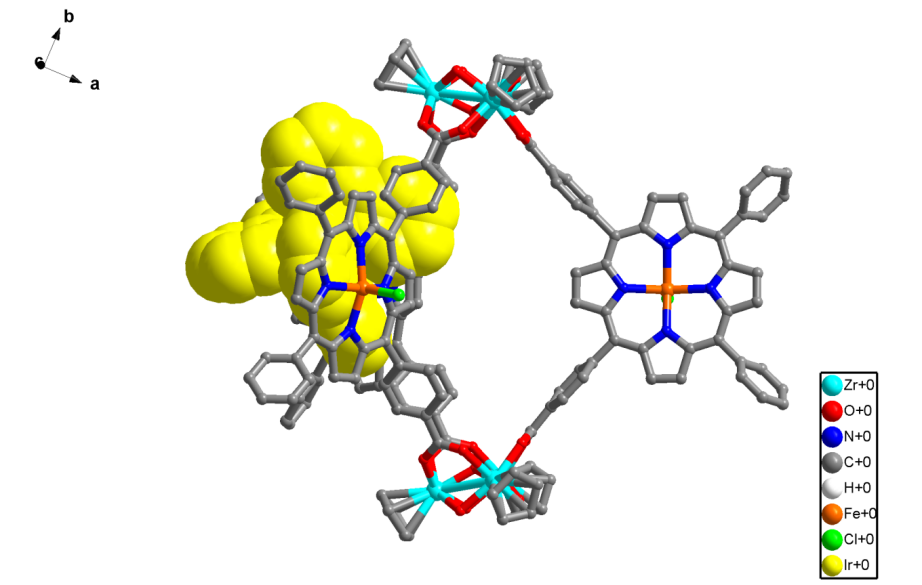


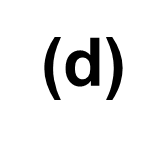

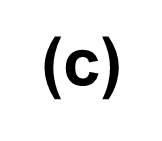

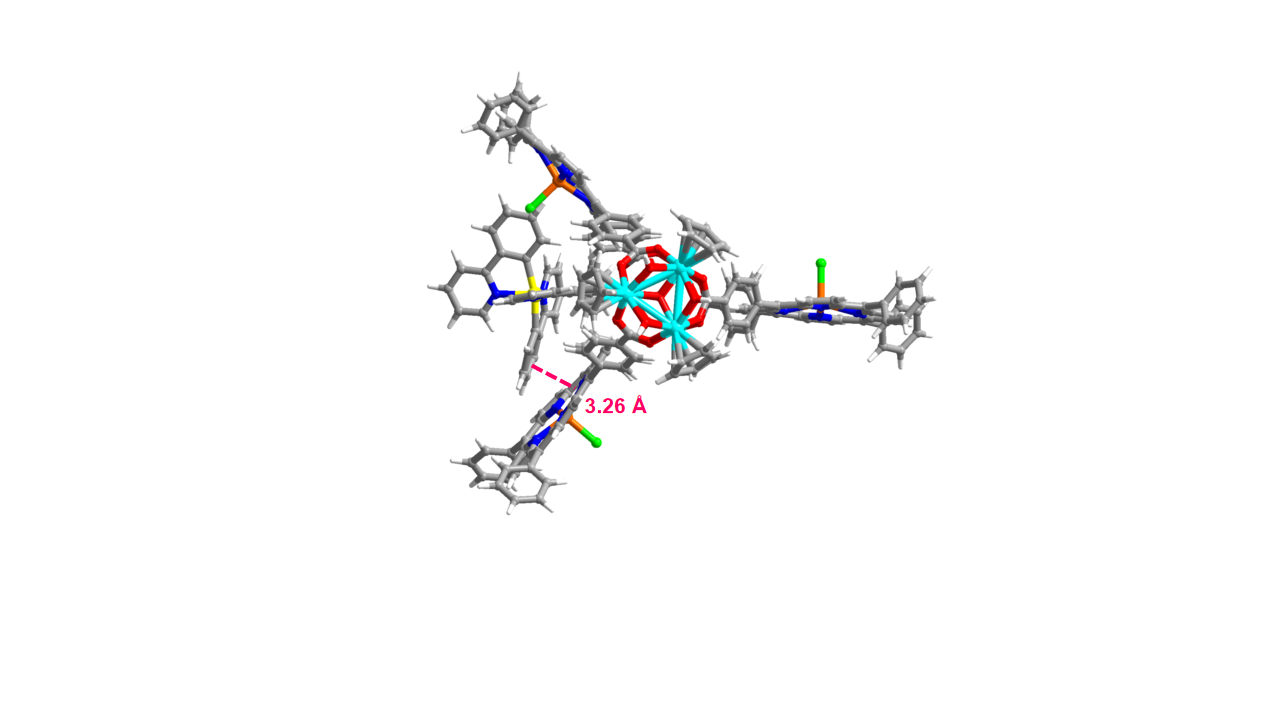

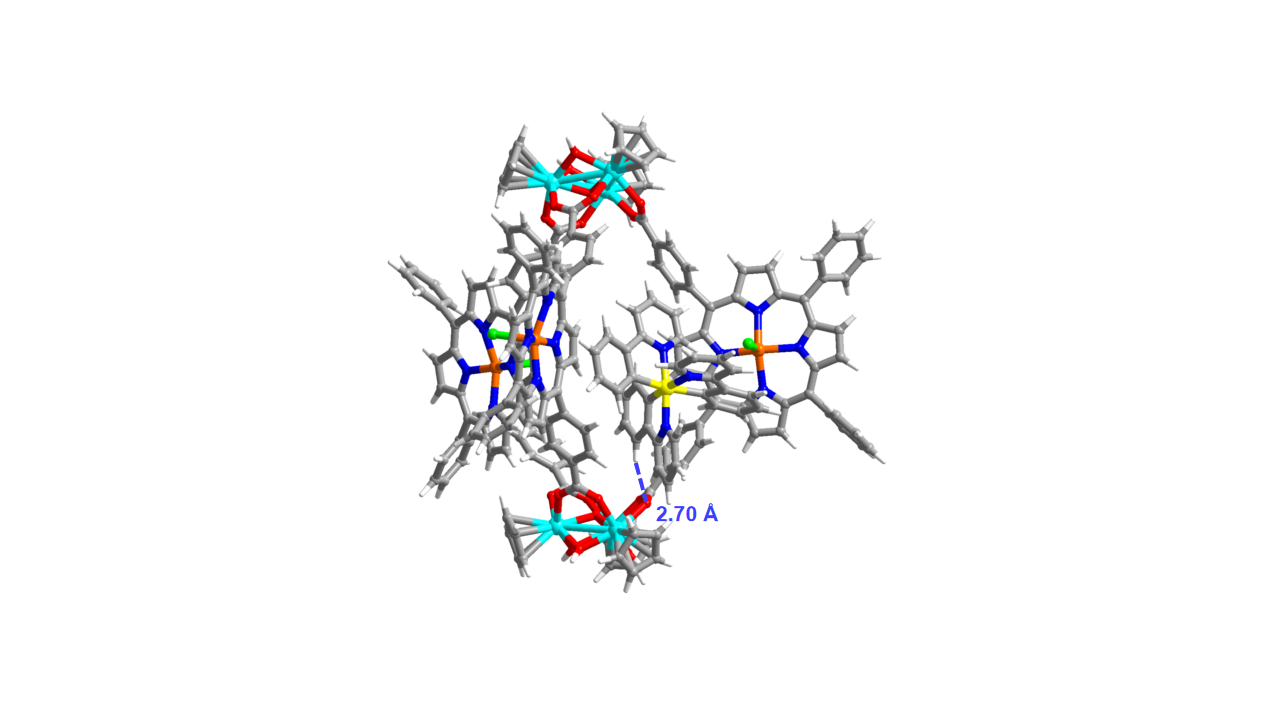


**Supplementary Fig. 7.** (a–d) DFT calculations of the **HIr** host-guest complex revealed that the Ir(ppy)3 guest spontaneously positioned at cleft binding sites of the host, and was stabilized by π stacking interactions with the shortest interplanar separation of 3.26 Å and hydrogen bonding interactions with the C−H···O separation being 2.70 Å. Zr cyan, Fe orange, Cl green, C gray, N blue, O red, Ir yellow, H white.

# 3. 1H NMR Spectra


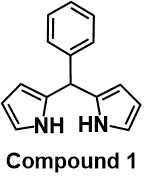
**Supplementary Fig. 8.** 1H NMR (400 MHz) spectrum of compound **1** in CDCl3. 1H NMR (400 MHz, CDCl3, ppm): *δ* 7.86 (s, 2H), 7.35–7.16 (m, 5H), 6.66 (q, *J* = 2.6 Hz, 2H), 6.14 (q, *J* = 2.8 Hz, 2H), 6.00–5.76 (m, 2H), 5.44 (s, 1H).


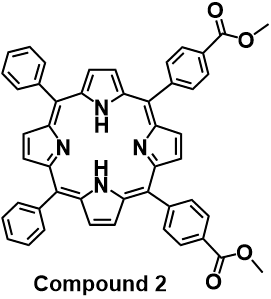
**Supplementary Fig. 9.** 1H NMR (400 MHz) spectrum of compound **2** in CDCl3. 1H NMR (400 MHz, CDCl3, ppm): *δ* 8.89–8.83 (m, 4H), 8.82–8.76 (m, 4H), 8.44 (d, *J* = 8.2 Hz, 4H), 8.30 (d, *J* = 8.2 Hz, 4H), 8.21 (d, *J* = 7.8 Hz, 4H), 7.76 (q, *J* = 7.2, 6.3 Hz, 6H), 4.11 (s, 6H), −2.79 (s, 2H).


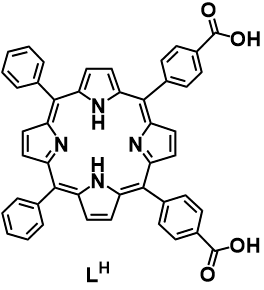
**Supplementary Fig. 10.** 1H NMR (400 MHz) spectrum of precursor **LH** in DMSO-*d6*. 1H NMR (400 MHz, DMSO-*d6*, ppm): *δ* 13.31 (s, 2H), 8.85 (s, 8H), 8.37 (q, *J* = 8.2 Hz, 8H), 8.23 (dd, *J* = 7.3, 1.7 Hz, 4H), 7.84 (q, *J* = 5.4 Hz, 6H), −2.93 (s, 2H).


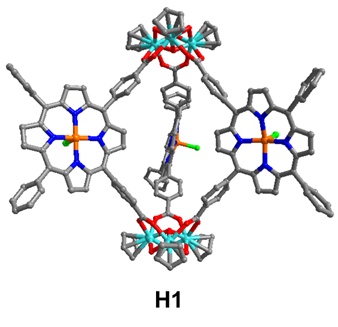
**Supplementary Fig. 11.** 1H NMR spectrum (400 MHz, CD3OD) of capsule **H1**, exhibiting paramagnetic broadening signals due to the existence of ferric iron on porphyrin units.

**Supplementary Fig. 12.** 1H NMR spectral changes (400 MHz, CD3CN) of a mixture of BIH (20.0 mM) and Ir(ppy)3 (0.10 mM) under Ar upon 420 nm photo-incubation for 5 min. The signals marked in the green box are assigned to the oxidation of BIH to BI+.**Supplementary Fig. 13.** 1H NMR spectral changes (400 MHz, CD3CN) of a mixture of **1a** (10.0 mM) and Ir(ppy)3 (0.10 mM) under Ar, upon photo-incubation at 420 nm for 3 min. The signals marked in the green box are assigned to the oxidized species generated on the pathway from **1a** to **4a**, specifically the non-dehydrogenated C–N coupled species.

# 4. ESI-MS Spectra

**Supplementary Fig. 14.**ESI-MS spectrum of ligand **LFe** (0.2 mM) in MeOH solution, showing the cationic species [**LFe**−Cl]+ at *m/z* = 756.1423 (calcd for C46H28N4O4Fe: 756.1455).

**Supplementary Fig. 15.** ESI-MS spectrum of capsule **H1** [C168H115N12O20Zr6Fe3Cl3] (0.2 mM) in MeOH solution.

**Supplementary Fig. 16.** Expansion of ESI-MS spectra for **H1** showing the [**H1**−3Cl]5+ with a found mass: 667.0138, [**H1**−2Cl]4+ with a found mass: 842.0158, [**H1**−Cl]3+ with a found mass: 1134.6721, [**H1**]2+ with a found mass: 1720.4890.

**Supplementary Table 4.** ESI-MS spectrometry analysis of **H1**

| **Symbol** | **Formula** | **Charge (z)** | **Calculated mass (*m/z*)** | **Found** |
| --- | --- | --- | --- | --- |
| [**H1**−3Cl]5+ | C168H115N12O20Zr6Fe3 | 5 | 666.8141 | 667.0138 |
| [**H1**−2Cl]4+ | C168H115N12O20Zr6Fe3Cl | 4 | 842.2600 | 842.0158 |
| [**H1**−Cl]3+ | C168H115N12O20Zr6Fe3Cl2 | 3 | 1134.6698 | 1134.6721 |
| [**H1**]2+ | C168H115N12O20Zr6Fe3Cl3 | 2 | 1719.4895 | 1720.4890 |

**Supplementary Fig. 17.** ESI-MS spectra of **H1** (0.5 mM) and the equimolar mixture of **H1** and Ir(ppy)3 [**HIr**, C201H138N15O20Zr6Fe3IrCl3] (0.5 mM) in MeOH solution. The inserts show the measured and simulated isotopic patterns of the peaks at *m/z* = 1720.4887 and 2047.0673.

#
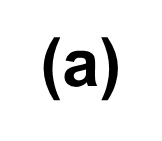
5. Fluorescence spectra


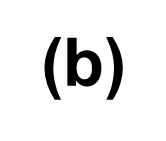


**Supplementary Fig. 18.** (a) Emission spectra of Ir(ppy)3 (50.0 µM) in CH3CN solution upon addition of **H1** (total [**H1**] = 1.0 µM). Spectra were recorded under Ar (λex = 420 nm; λem = 525 nm). (b) The Hill-plot fitting of the titration curve showing a 1:1 host-guest behavior between **H1** and Ir(ppy)3 with an association constant calculated as 1.05 × 105 M−1.

**Supplementary Fig. 19.** Fluorescence spectra of Ir(ppy)3 (50.0 μM) in CH3CN solution under CO2 atmosphere upon sequential addition of **H1** (total 1.0 μM) and BIH (total 1.0 mM). Spectra were recorded with excitation at 420 nm and emission at 525 nm.


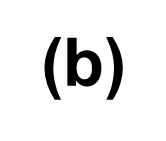

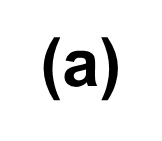


**Supplementary Fig. 20.** (a) The emission spectra of Ir(ppy)3 (50.0 μM) in CH3CN solution under CO2 atmosphere upon addition ofBIH (total 100 μM). (b) The Stern-Volmer fitting of the titration curve at 525 nm with an associated quenching constant calculated as 1.78 × 104 M−1. Spectra were recorded with excitation at 420 nm and emission at 525 nm.

**Supplementary Fig. 21.** Luminescence decay profiles in CH3CN solution: Ir(ppy)3 (0.10 mM), τ = 1.17 μs (red); **HIr** (0.10 mM Ir(ppy)3 and 0.10 μM **H1**), τ = 1.05 μs (green); **HIr** with added BIH (50.0 mM), τ = 0.43 μs (orange); Ir(ppy)3 with added BIH (50.0 mM), τ = 0.42 μs (purple). All decays were monitored at 525 nm upon excitation at 380 nm.


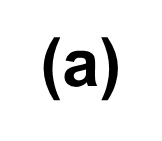

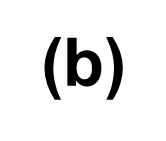


**Supplementary Fig. 22.** (a) The time-dependent fluorescence spectra of typical photocatalytic systems of BIH (50.0 mM), TFE (1.0 M), and Ir(ppy)3 (0.10 mM) in CH3CN solution under CO2 atmosphere during photo-incubation, the fluorescence intensity was recorded at 525 nm and excited at 420 nm. (b) Fitting of the time-dependent fluorescence intensity at λem = 525 nm during photo-incubation.


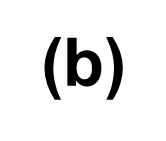

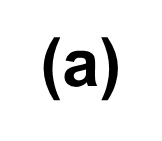


**Supplementary Fig. 23.** (a) The emission spectra of Ir(ppy)3 (50.0 μM) in CH3CN solution under CO2 atmosphere upon addition ofascorbic acid (AA, total 0.1 mM). (b) The Stern-Volmer fitting of the titration curve at 525 nm with an associated quenching constant calculated as 8.80 × 103 M−1. Spectra were recorded with excitation at 420 nm and emission at 525 nm.


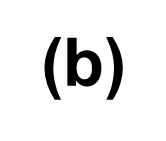

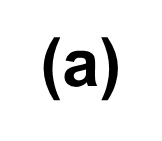


**Supplementary Fig. 24.** (a) The emission spectra of Ir(ppy)3 (50.0 μM) in CH3CN solution under CO2 atmosphere upon addition of sodium ascorbate (SA, total 0.1 mM). (b) The Stern-Volmer fitting of the titration curve at 525 nm with an associated quenching constant calculated as 1.19 × 104 M−1. Spectra were recorded with excitation at 420 nm and emission at 525 nm.


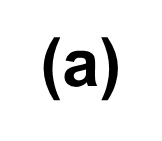

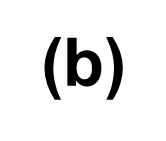


**Supplementary Fig. 25.** (a) The emission spectra of Ir(ppy)3 (50.0 μM) in CH3CN solution under CO2 atmosphere upon addition oftriethylamine (TEA, total 0.1 mM). (b) The Stern-Volmer fitting of the titration curve at 525 nm with an associated quenching constant calculated as 8.10 × 103 M−1. Spectra were recorded with excitation at 420 nm and emission at 525 nm.

**
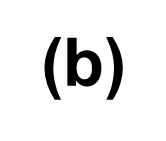

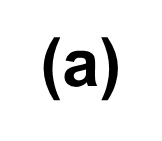
**

**Supplementary Fig. 26.** (a) The emission spectra of Ir(ppy)3 (50.0 μM) in CH3CN solution under CO2 atmosphere upon addition oftriethanolamine (TEOA, total 0.1 mM). (b) The Stern-Volmer fitting of the titration curve at 525 nm with an associated quenching constant calculated as 1.10 × 104 M−1. Spectra were recorded with excitation at 420 nm and emission at 525 nm.

**Supplementary Table 5.** Quenching efficiency of various quenchers against photoexcited Ir(ppy)3: Stern-Volmer constants (kq) and derived pseudo-first-order rates (kq[Q]) under catalytic conditions

| **Quencher (Q)** | **Quenching constant (kq)** | **kq[Q]** |
| --- | --- | --- |
| **H1** | 7.21 × 1011 M−1·s−1 | 7.21 × 105 s−1 |
| BIH | 1.53 × 1010 M−1·s−1 | 1.53 × 106 s−1 |
| AA | 7.55 × 109 M−1·s−1 | 6.80 × 105 s−1 |
| SA | 1.02 × 1010 M−1·s−1 | 5.10 × 105 s−1 |
| TEA | 6.95 × 109 M−1·s−1 | 6.95 × 105 s−1 |
| TEOA | 9.44 × 109 M−1·s−1 | 2.82 × 105 s−1 |

**Supplementary Fig. 27.** Comparison of emission lifetimes (τ) for Ir(ppy)3 (0.1 mM in CH3CN) under argon atmosphere: Without additive and with 50.0 mM additions of AA, SA, TEA, TEOA, or BIH. All decays were monitored at 525 nm with excitation at 380 nm.


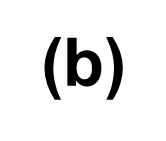

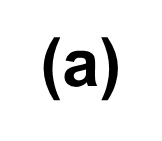


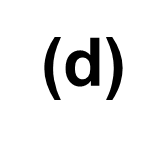

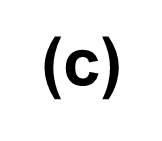


**Supplementary Fig. 28.** (a–c) Fluorescence quenching spectra of photocatalytic systems containing **1a** (10.0 mM), **2a** (10.0 mM), or **3a** (10.0 mM) with TFE (1.0 M) and Ir(ppy)3 (0.10 mM) under CO2 atmosphere during photo-incubation, monitored at 525 nm (λex = 420 nm). (d) The fluorescence decay kinetics at 525 nm for substrates **1a**, **2a**, and **3a**, respectively, during photo-incubation.


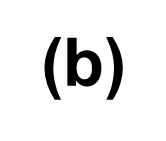

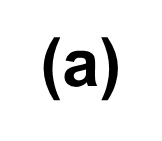


**Supplementary Fig. 29.** (a) Emission spectral changes of Ir(ppy)3 (50.0 μM) upon addition of **1a** (total 50.0 μM). (b) The Stern-Volmer fitting of the titration curve at 525 nm with an associated quenching constant calculated as 1.67 × 104 M−1. Spectra were recorded with excitation at 420 nm and emission at 525 nm.


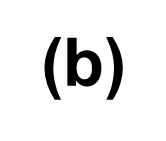

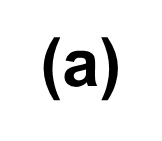


**Supplementary Fig. 30.** Fluorescence titration experiments of **HIr** (**H1**/Ir(ppy)3 = 1:1) and **1a** in CH3CN solution under CO2 atmosphere. (a) Emission spectral changes of **HIr** (10.0 μM) upon addition of **1a** (total 30.0 μM). (b) The Stern-Volmer fitting of the titration curve at 525 nm, providing an associated quenching constant calculated as 8.77 × 104 M−1 (1:1 binding model). Spectra were recorded with excitation at 420 nm and emission at 525 nm.

# 6. UV−vis Spectra

**Supplementary Fig. 31.** UV−vis absorption spectra of compound **2** (0.01 mM, green line), ligand **LFe** (0.01 mM, red line), capsule **H1** (0.01 mM, orange line) and Cp2ZrCl2 (0.10 mM, blue line) in CH3CN solution.


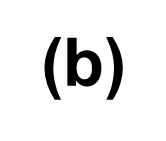

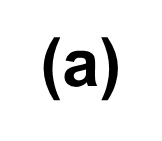

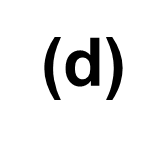

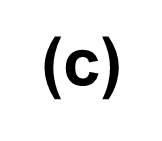


**Supplementary Fig. 32.** UV−vis titration experiments of **H1** and Ir(ppy)3 under Ar atmosphere. (a) UV−vis absorption difference spectra in CH3CN solution containing **H1** (5.0 μM) upon addition of Ir(ppy)3 (total 3.0 μM), showing an isosbestic point at 420 nm. (b) The Hill plot of the titration curve of **H1** at 412 nm after adding Ir(ppy)3 showing the association constant calculated as 1.33 × 105 M−1 (1:1 binding model). (c) The differential titration spectra observed upon the addition of a pre-incubated Ir(ppy)3 (from 0 to 0.4 μM) to **H1** (3.0 μM) in CH3CN, primarily corresponding to the host-guest complexation. (d) The differential titration spectra observed upon further addition of the pre-incubated Ir(ppy)3 (from 1.0 to 20.0 μM), primarily reflecting the reduction of the Fe center from FeIII to FeI.


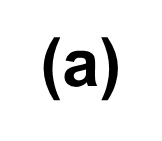

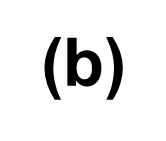


**Supplementary Fig. 33.** UV−vis studies of a photocatalytic system containing Ir(ppy)3 (0.10 mM), BIH (50.0 mM), and TFE (0.25 M) in CH3CN solution under CO2 atmosphere. (a) Time-dependent spectral changes during photo-incubation, showing an isosbestic point at 296 nm. (b) Spectral evolution during subsequent photocatalysis.

**Supplementary Fig. 34.** UV−vis spectral changes during direct photocatalysis (without incubation) of a system containing Ir(ppy)3 (0.10 mM), BIH (50.0 mM), and TFE (0.25 M) in CH3CN solution under CO2 atmosphere, showing an isosbestic point at 296 nm.


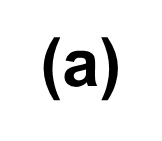

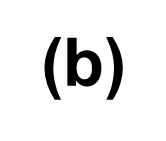


**Supplementary Fig. 35.** UV−vis studies of a photocatalytic system containing Ir(ppy)3 (0.10 mM), BIH (50.0 mM), and TFE (0.25 M) in CH3CN solution under CO2 atmosphere. (a) Kinetic traces of absorbance changes at 312 nm for incubation, post-incubation catalysis, and direct catalysis, respectively. (b) Comparison of UV−vis spectra for the incubated versus the non-incubated photocatalytic systems upon 420 nm LED irradiation for 6 min under CO2 atmosphere.

**Supplementary Fig. 36.** UV−vis spectra recorded in photoaccumulation experiment with **H1** (3.0 μM), BIH (30.0 mM), and Ir(ppy)3 (10.0 μM) in CH3CN solution under CO2 atmosphere, blue LED (λem = 420 nm, 130 mW·cm−2), at room temperature.


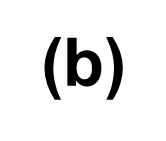

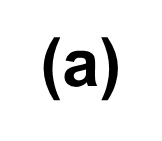


**Supplementary Fig. 37.** UV−vis spectroscopic studies of substrate **1a** in a typical photocatalytic system under CO2 atmosphere during photo-incubation. (a) Time-dependent UV−vis spectra of a system containing **1a** (10.0 mM), TFE (1.0 M), and Ir(ppy)3 (0.10 mM) in CH3CN solution during photo-incubation upon 420 nm LED irradiation, showing an isosbestic point at 318 nm. (b) Temporal changes of the absorbance at 380 nm.

# 7. Electrochemical Measurements

**Supplementary Fig. 38.** Cyclic voltammograms of **H1** (0.25 mM) and **LFe** (0.75 mM) in DMF/MeOH (9:1 v/v) solution containing 0.10 M TBAPF6. Scan Rate: 100 mV/s.


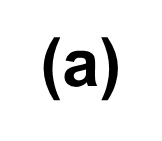

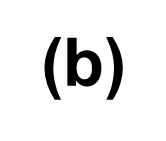


**Supplementary Fig. 39.** (a) Cyclic voltammograms of **H1** (0.50 mM) upon addition of Et3N·HCl in DMF/MeOH (9:1 v/v) solution containing 0.10 M TBAPF6 under Ar atmosphere, showing the proton reduction catalytic peak. Scan rate: 100 mV/s. (b) The linear relationship between the current of Et3N·HCl related proton reduction catalytic peaks and the concentration of Et3N·HCl.

**Supplementary Fig. 40.** Cyclic voltammograms of CO2 reduction catalyzed by **H1** (0.25 mM) in DMF/MeOH (9:1 v/v) solution containing TBAPF6 (0.10 M), recorded under CO2 atmosphere. Scan rate: 100 mV/s.

**Supplementary Fig. 41.** Effect of CO2 bubbling duration on linear sweep voltammograms of ligand **LFe** (0.75 mM) in DMF/MeOH (9:1 v/v) solution containing TBAPF6 (0.10 M) under Ar atmosphere. Scan rate: 100 mV/s.

**Supplementary Fig. 42.** Effect of CO2 bubbling duration on linear sweep voltammograms of **H1** (0.25 mM) in DMF/MeOH (9:1 v/v) solution containing TBAPF6 (0.10 M) under Ar atmosphere. Scan rate: 100 mV/s.


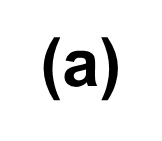

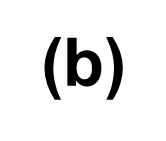


**Supplementary Fig. 43.** (a) Normalized square wave voltammograms of BIH and Ir(ppy)3, respectively, in CH3CN solution containing 0.10 M TBAPF6, showing the different substrate-related proton reduction catalytic peaks. (b) Normalized square wave voltammograms of 0.20 mM **1a**, **2a**, and **3a**, respectively, in CH3CN solution containing 0.10 M TBAPF6, showing the different substrate activated oxidation catalytic peaks. Scan rate: 100 mV/s.


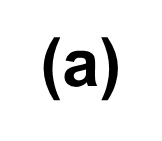

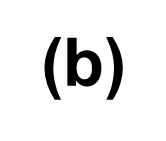


**Supplementary Fig. 44.** Normalized square-wave voltammograms of (a) substrate **1a**−**1f** and (b) substrate **2a**−**2f** in CH3CN solution containing TBAPF6 (0.10 M), revealing the catalytic oxidation peaks of substrates. Scan rate: 100 mV/s.

# 8. Photocatalytic Studies

## 8.1 Photocatalytic CO2 reduction

Photocatalytic CO2 reduction experiments were performed in septum-sealed 15 mL quartz reactors equipped with a magnetic stir bar and water cooling. A standard reaction contained BIH (56.0 mg, 50.0 mM), trifluoroethanol (TFE, 90.0 μL, 0.25 M), and tris(2-phenylpyridine)iridium (III) (Ir(ppy)3, 0.10 mM) in CH3CN solution (4.91 mL). The reactor was sealed with a rubber plug and purged with CO2 for 20 min. The mixture was then pre-irradiated (420 nm LED) under vigorous stirring at 25℃ for 15 min photoactivation prior to catalyst injection (named incubation). After activation, **H1** (10.0 μL, 0.05 mM in methanol) was injected through the septum with a microsyringe. Headspace gas (100.0 μL aliquots) was periodically sampled using a gastight syringe and analyzed by GC-FID. Control experiments under identical conditions with Ar-purged systems confirmed CO2 as the exclusive carbon source (no CO detected). Control experiments with 13CO2 further confirmed the exclusive derivation of CO from carbon dioxide, as evidenced by the detection of 13CO (*m/z* = 29) via GC-MS.

**Supplementary Fig. 45.** Comparison of TON for CO production under different concentrations of **H1**. Standard photocatalysis conditions: Ir(ppy)3 (0.10 mM), BIH (50.0 mM), and TFE (0.25 M) in CH3CN solution with a preincubation time of 15 min and photocatalysis time of 30 min.

**Supplementary Table 6.** Photocatalytic activity under different catalytic conditions*a*

| Entry | BIH  (mM) | Cat  (μM) | TFE  (M) | Ir(ppy)3  (mM) | CO  (μL) | H2  (μL) | CH4  (μL) | TONCO | TOFCOmax  (s−1) | SelCO  (%) |
| --- | --- | --- | --- | --- | --- | --- | --- | --- | --- | --- |
| 1 | − | 0.10 | 0.25 | 0.10 | 0 | 0 | 0 | 0 | − | − |
| 2 | 50.0 | − | 0.25 | 0.10 | 0 | 0 | 0 | 0 | − | − |
| 3 | 50.0 | 0.10 | − | 0.10 | 24 | 0 | 0 | 2,160 | 1.81 | 99.9 |
| 4 | 50.0 | 0.10 | 0.25 | − | 22 | 0 | 0 | 1,920 | 1.75 | 99.9 |
| 5 | 50.0 | 0.10 | 0.25 | 0.10 | 1,630 | 0 | 0 | 145,520 | 165.84 | 99.9 |
| 6*b* | 50.0 | 0.10 | 0.25 | 0.10 | 508 | 0 | 0 | 45,360 | 40.54 | 99.9 |
| 7*c* | 50.0 | 0.10 | 0.25 | 0.10 | 0 | 0 | 0 | 0 | − | − |
| 8*d* | 50.0 | 0.30 | 0.25 | 0.10 | 492 | 0 | 0 | 14,652 | 21.47 | 99.9 |

*a*Reaction conditions: Ir(ppy)3 (0.10 mM), BIH (50.0 mM), TFE (0.25 M) and **H1** (0.10 μM) in CO2-saturated CH3CN under standard conditions for 30 min. *b*Non-incubation. *c*Ar atmosphere (CO2-free). *d*Replacing **H1** with ligand H2**LFe** (0.30 μM).

**Supplementary Fig. 46.** Photocatalytic CO2 reduction by **H1** under standard catalytic conditions: Ir(ppy)3 (0.10 mM), BIH (50.0 mM), TFE (0.25 M) and **H1** (0.10 μM) in CH3CN solution with a preincubation time of 15 min and photocatalysis time of 30 min.

**Supplementary Table 7.** Photocatalytic activity in different solvents*a*

| Entry | | Solvent | CO (μL) | | H2 (μL) | | CH4 (μL) | TON  (CO) | TON  (H2) | SelCO (%) |
| --- | --- | --- | --- | --- | --- | --- | --- | --- | --- | --- |
| 1  2  3  4  5*b*  6  7*c*  8*b*  9  10*c* | MeCN  MeCN/H2O (1:1)  MeCN/H2O (1:4)  DMSO  DMSO  EtOH  EtOH  EtOH/H2O (1:1)  DMF  DMF | | | 1,630  1.4  0  16.4  9.0  32.5  0.5  0  12.3  2.3 | 0  0.07  9.0  0  0  0  0  29.6  0  1.1 | 0  0  0  45.3  39.9  0  0  0  0.5  3.2 | | 145,520  120  0  1,453  800  2,893  −  0  1,100  − | 0  6  201  0  0  0  −  2635  0  − | 99.9  95.2  0  26.6  18.4  99.9  −  0  96.1  − |

*a*Reaction conditions: Ir(ppy)3 (0.10 mM), BIH (50.0 mM), TFE (0.25 M) and **H1** (0.10 μM) in CO2-saturated CH3CN under standard reaction conditions for 30 min. *b*TFE-free. *c*TFE and **H1**-free.

**Supplementary Table 8.** Photocatalysis under different concentrations of TFE*a*

| Entry | TFE (M) | CO (μL) | H2 (μL) | TONCO | TONH2 | SelCO (%) |
| --- | --- | --- | --- | --- | --- | --- |
| 1  2  3  4  5  6  7  8 | 0.03  0.06  0.13  0.25  0.50  1.0  1.50  2.0 | 6.7  23.5  233  1,630  713  268  115  71 | 0  0  0  0  0  0  11.4  7.6 | 600  2,103  20,783  145,520  63,624  23,957  10,280  6,360 | 0  0  0  0  0  0  1,020  680 | 99.9  99.9  99.9  99.9  99.9  99.9  91.0  90.3 |

*a*Reaction conditions: Ir(ppy)3 (0.10 mM) and BIH (50.0 mM) in CO2-saturated CH3CN, with TFE concentration varied (from 0.03 to 2.0 M) under standard reaction conditions for 30 min.

**Supplementary Table 9.** Photocatalysisunder different concentrations of Ir(ppy)3*a*

| Entry | Ir(ppy)3 (mM) | CO (μL) | H2 (μL) | TONCO | TONH2 | SelCO (%) |
| --- | --- | --- | --- | --- | --- | --- |
| 1 | 0.05 | 912 | 0 | 81,400 | 0 | 99.9 |
| 2 | 0.08 | 1,231 | 0 | 109,880 | 0 | 99.9 |
| 3 | 0.10 | 1,630 | 0 | 145,520 | 0 | 99.9 |
| 4 | 0.15 | 883 | 0 | 78,820 | 0 | 99.9 |
| 5 | 0.20 | 683 | 0 | 61,002 | 0 | 99.9 |

*a*Reaction conditions: TFE (0.25 M) and BIH (50.0 mM) in CO2-saturated CH3CN, with Ir(ppy)3 concentration varied (from 0.05 to 0.20 mM) under standard reaction conditions for 30 min.

**Supplementary Table 10.** Photocatalysisunder different concentrations of electron donors BIH*a*

| Entry | BIH (mM) | CO (μL) | H2 (μL) | TONCO | TONH2 | SelCO (%) |
| --- | --- | --- | --- | --- | --- | --- |
| 1 | 12.5 | 1,138 | 0 | 101,600 | 0 | 99.9 |
| 2 | 25.0 | 1,346 | 0 | 120,200 | 0 | 99.9 |
| 3 | 50.0 | 1,630 | 0 | 145,520 | 0 | 99.9 |
| 4 | 100.0 | 1,186 | 0 | 105,900 | 0 | 99.9 |
| 5 | 150.0 | 913 | 0 | 81,495 | 0 | 99.9 |

*a*Reaction conditions: TFE (0.25 M) and Ir(ppy)3 (0.10 mM) in CO2-saturated CH3CN, with BIH concentration varied (from 12.5 to 150.0 mM) under standard conditions for 30 min.

**Supplementary Table 11.** Photocatalysis at different catalyst concentrations*a*

| Entry | Cat (μM) | CO (μL) | H2 (μL) | TONCO | TONH2 | SelCO (%) |
| --- | --- | --- | --- | --- | --- | --- |
| 1  2  3  4  5 | 0.025  0.05  0.10  0.20  0.40 | 137  324  1,630  2,489  4,075 | 0  0  0  0  0 | 48,880  57,920  145,520  111,110  90,950 | 0  0  0  0  0 | 99.9  99.9  99.9  99.9  99.9 |

*a*Reaction conditions: Ir(ppy)3 (0.10 mM), BIH (50.0 mM) and TFE (0.25 M) in CO2-saturated CH3CN, with **H1** concentration varied (from 0.025 to 0.40 μM) under standard conditions for 30 min.

**Supplementary Table 12.** Photocatalysis under various conditions without incubation*a*

| Entry | | Solvent | CO (μL) | H2  (μL) | | CH4 (μL) | | TON  (CO) | | TON(H2) | SelCO (%) | |
| --- | --- | --- | --- | --- | --- | --- | --- | --- | --- | --- | --- | --- |
| 1  2*b*  3*c*  4*d*  5  6  7*b*  8*d*  9*b*  10  11  12  13*d* | MeCN  MeCN  MeCN  MeCN  MeCN/H2O (1:1)  MeCN/H2O (1:4)  DMSO  DMSO  EtOH  EtOH  EtOH/H2O (1:1)  DMF  DMF | | 1.6  13.4  1.6  166  0.9  0  201  340  6.3  0.5  2.0  2.2  10.3 | 1.6  6.7  6.7  5.2  133  9.0  13.7  33.6  84.4  36.7  661  1.1  4.3 | 0  0  0  0  0  0  220  282  0  0  0  3.1  4.3 | | 37  300  33  3,695  20  0  4,482  7,589  142  12  45  52  230 | | 34  152  150  115  2,966  201  306  752  1,886  822  14,757  26  93 | | | 50.0  66.7  19.3  97.0  0.7  0  46.2  51.9  6.9  1.3  0.3  34.4  54.5 |

*a*Reaction conditions: All reactions were conducted non-incubation by direct addition of **H1** (0.40 μM) to CO2-saturated CH3CN containing Ir(ppy)3 (0.20 mM), BIH (50.0 mM), and TFE (0.20 M) for 30 min. *b*TFE-free. *c***H1**-free. *d*TFE and **H1**-free.

**Supplementary Table 13.** Photocatalysis under different TFE concentrations without incubation*a*

| Entry | TFE (M) | CO (μL) | H2 (μL) | TONCO | TONH2 | SelCO (%) |
| --- | --- | --- | --- | --- | --- | --- |
| 1  2  3  4  5  6  7  8 | 0.03  0.06  0.12  0.25  0.50  1.0  1.50  2.0 | 29.3  35.4  73.0  520  400  166  115  71.2 | 1.8  3.8  4.5  3.1  3.4  5.2  11.4  7.6 | 656  793  1,632  11,595  8,919  3,695  2,572  1,591 | 40  85  100  68  74  115  255  168 | 94.2  90.3  94.2  99.4  99.2  97.0  91.0  90.3 |

*a*Reaction conditions: All catalytic systems were employed non-incubation. Reactions were conducted in CO2-saturated CH3CN under the following conditions: Ir(ppy)3 (0.20 mM), BIH (50.0 mM), and **H1** (0.40 μM) for 30 min. The concentration of TFE was varied (0.03 to 2.0 M).

**Supplementary Table 14.** Photocatalysis under different Ir(ppy)3 concentrations without incubation*a*

| Entry | Ir(ppy)3 (mM) | CO (μL) | H2 (μL) | TONCO | TONH2 | SelCO (%) |
| --- | --- | --- | --- | --- | --- | --- |
| 1 | 0.05 | 448 | 2.2 | 10,121 | 54 | 99.5 |
| 2 | 0.10 | 650 | 4.5 | 14,735 | 114 | 99.3 |
| 3 | 0.20 | 515 | 2.2 | 11,595 | 68 | 99.6 |
| 4 | 0.30 | 269 | 11.2 | 6,154 | 258 | 96.0 |

*a*Reaction conditions: All catalytic systems were employed non-incubation. Reactions were conducted in CO2-saturated CH3CN under the following conditions: TFE (0.25 M), BIH (50.0 mM), and **H1** (0.40 μM) for 30 min. The concentration of Ir(ppy)3 was varied (0.05 to 0.30 mM).

**Supplementary Table 15.** Photocatalysis under different BIH concentrations without incubation*a*

| Entry | BIH (mM) | CO (μL) | H2 (μL) | TONCO | TONH2 | SelCO (%) |
| --- | --- | --- | --- | --- | --- | --- |
| 1 | 12.5 | 176 | 0.4 | 3,933 | 10 | 99.7 |
| 2 | 25.0 | 481 | 3.4 | 10,746 | 78 | 99.3 |
| 3 | 50.0 | 650 | 4.5 | 14,735 | 114 | 99.3 |
| 4 | 100.0 | 321 | 10.8 | 7,172 | 239 | 96.8 |
| 5 | 200.0 | 372 | 24.0 | 8,308 | 533 | 94.0 |

*a*Reaction conditions: All catalytic systems were employed non-incubation. Reactions were conducted in CO2-saturated CH3CN under the following conditions: TFE (0.25 M), Ir(ppy)3 (0.10 mM), and **H1** (0.40 μM) for 30 min. The concentration of BIH was varied (12.5 to 200.0 mM).

**Supplementary Fig. 47.** Comparison of TON and TOF for photocatalytic CO2-to-CO conversions reported in the literature. Catalytic times are normalized to 1 h with the concentrations of catalysts more than 2.0 nM.

**Supplementary Table 16.** Catalytic systems for the light-driven CO2-to-CO conversion reported with catalyst concentrations ≥ 2.0 nM

| **Catalyst** | **Photosensitizer** | **Electron donor** | **Solvent** | **Light source** | **Reaction time** | **TONCO** | **TOFCOmax(****h−1)** | **SelCO (%)** | **Reference** |
| --- | --- | --- | --- | --- | --- | --- | --- | --- | --- |
| **H1** | Ir(ppy)3 | BIH | MeCN | blue LEDs  (λ = 420 nm) | 5 h | 362,723 | 597,024 | 99.9 | **This work** |
| CoCo | [Ru(phen)3](PF6)2 | BIH | MeCN/H2O/MeOH | Xe lamp  (λ > 420 nm) | 10 h | 14,457 | 1,440 | 95.0 | 3 |
| FeTDHPP | CuPP | BIH | DMF | Xe lamp  (λ > 400 nm) | 23 h | 16,109 | 7,650 | 95.0 | 4 |
| MnMes-  CO2TFE | 4DPAIPN | BIH | DMSO | blue LEDs  (λmax = 478 nm) | 48 h | 8770 | 361.8 | >99 | 5 |
| CoTMPyP | Cu(P^P-(SO3Na)2)(N^N(SO3Na)2)]BF4 | AscHNa | H2O | Xe lamp  (λ > 400 nm) | 4 h | 2,680 | 2,600 | 77.0 | 6 |
| Fe1 | PS1 | BIH | DMF | blue LEDs  (λ = 450 nm) | 10 h | 10,476 | 1,048 | 100 | 7 |
| CoTPPS | CuInS2 QD | NaAsc/  TCEP | H2O | blue LEDs  (λ = 450 nm) | 95 h | 84,101 | 8,063 | >99 | 8 |
| FePB-2(P) | Ir(ppy)3 | BIH | MeCN | blue LEDs  (λ = 440 nm) | 1 h | 7,006 | 85,740 | 97.0 | 9 |
| Ni(Cl)SN3Por | [Ru(bpy)3]Cl2 | TEOA | MeCN/H2O | blue LEDs  (λ = 465 nm) | 2 h | 71 | 36 | 96.4 | 10 |
| Co(*o*TMPyP) | CuPS | AscHNa | H2O | Xe lamp  (λ > 400 nm) | 12 h | 4,000 | 1170 | 90.0 | 11 |
| Fe-NO/NC | [Ru(bpy)3]Cl2 | TEOA | MeCN/H2O | Xe lamp  (λ > 400 nm) | 1 h | 1,494 | 1,494 | 70.0 | 12 |
| FeIII(L1)Cl | [CuI(bathocupoine)(x-antphos)](PF6) | BIH | CH3CN/  TEOA | Xe lamp  (λ > 400 nm) | 3 h | 1,500 | 989 | 96.0 | 13 |
| Co(bpy)2Cl2 | BPEPy-100 | TEOA | MeCN/H2O | Xe lamp  (λ > 420 nm) | 24 h | 2,980 | 188 | 90.0 | 14 |
| [Fe(qpy)(OH2)2]2+ | Ir-6 | BIH | MeCN/H2O | Xe lamp  (λ > 420 nm) | 30 h | 9150 | 341 | 98.0 | 15 |
| CoFPc | CuBCP | BIH | MeCN/TEA | blue LEDs  (λ = 425 nm) | 2 h | 9,185 | 41,280 | ~100 | 16 |
| Fe(II)-quaterpyridine | methylated Al(III) | BIH/  TEOA | MeCN | blue LEDs  (λ = 450 nm) | 4 h | 10,250 | 5,100 | 99.0 | 17 |
| Co-complex | mpg-C3N4 | BIH/  PhOH | MeCN | Xe lamp  (λ > 400 nm) | 24 h | 128 | 5 | 98.0 | 18 |
| NiFe | [Ru(bpy)3]Cl2 | BIH/TEOA | MeCN | blue LEDs  (λ = 450 nm) | 4 h | 670 | 525 | 93.0 | 19 |
| 1c | Ir(ppy)3 | TEA | MeCN | Xe lamp | 7 h | 98,000 | 14,040 | 98.0 | 20 |

**Data for photocatalysis**


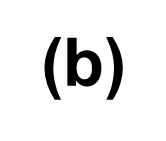

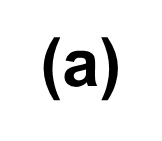


**Supplementary Fig. 48.** Comparison of (a) turnover number (TONCO) and (b) turnover frequency (TOFCO) for photocatalytic CO2-to-CO conversion between systems with and without photo-incubation as a function of time under standard catalytic conditions: Ir(ppy)3 (0.10 mM), BIH (50.0 mM), TFE (0.25 M), **H1** (0.10 μM). Photo-incubation time: 15 min.

**Supplementary Fig. 49.** Comparison of TON for photocatalytic CO2-to-CO conversion between systems with and without photo-incubation as a function of time under standard catalytic conditions with Ir(ppy)3 (0.10 mM), BIH (50.0 mM), TFE (0.25 M), and H2**LFe** (0.30 μM). Photo-incubation time: 15 min.


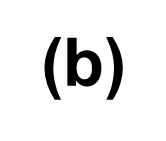

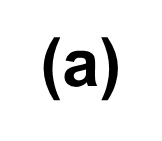


**Supplementary Fig. 50.** Photocatalytic kinetics studies of TFE concentration effects. (a) Photocatalytic CO2 reduction experiment in CH3CN solution as a function of the TFE concentration with Ir(ppy)3 (0.10 mM), BIH (50.0 mM), and **H1** (0.10 μM) remaining fixed. (b) Plot of initial TOF (initial 10 min) versus TFE concentration.


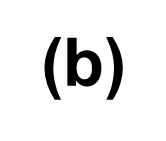

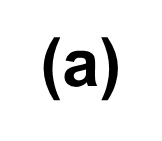


**Supplementary Fig. 51.** Photocatalytic kinetics studies of Ir(ppy)3 concentration effects. (a) Photocatalytic CO2 reduction experiment in CH3CN solution as a function of the concentration of Ir(ppy)3 with TFE (0.25 M), BIH (50.0 mM), and **H1** (0.10 μM) remaining fixed. (b) Plot of initial TOF (initial 10 min) versus Ir(ppy)3 concentration.


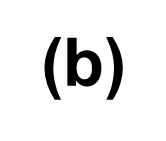

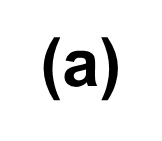


**Supplementary Fig. 52.** Photocatalytic kinetics studies of BIH concentration effects. (a) Photocatalytic CO2 reduction experiment in CH3CN solution as a function of the concentration of BIH with TFE (0.25 M), Ir(ppy)3 (100 μM), and **H1** (0.10 μM) remaining fixed. (b) Plot of initial TOF (initial 10 min) versus BIH concentration.


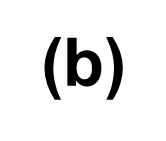

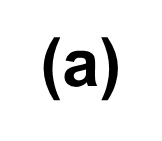


**Supplementary Fig. 53.** Photocatalytic kinetics studies of **H1** concentration effects. (a) Photocatalytic CO2 reduction experiment in CH3CN solution as a function of the concentration of **H1** with TFE (0.25 M), BIH (50.0 mM), and Ir(ppy)3 (100 μM) remaining fixed. (b) Plot of initial TOF (initial 10 min) versus **H1** concentration.

**Supplementary Fig. 54.** Kinetics of CO2 photoreduction under varied TFE concentrations, showing pseudo-first-order rate fitting with ln(C0/Ct) plotted as a function of time. C0 represents the initial effective electron concentration, while Ct denotes the remaining effective electron concentration in solution after CO production. Catalytic conditions: Ir(ppy)3 (0.10 mM), BIH (50.0 mM), TFE (0.25 M), **H1** (0.10 μM) with a photo-incubation time of 15 min.


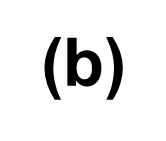

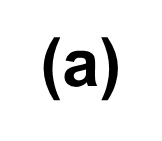


**Supplementary Fig. 55.** Photocatalytic kinetics of the Fe‑porphyrin monomer (H2**LFe**) system under pre‑incubation conditions. (a) Photocatalytic CO2 reduction experiment in CH3CN as a function of Ir(ppy)3 concentration, with fixed concentrations of TFE (0.25 M), BIH (50.0 mM), and H2**LFe** (0.30 μM). (b) Plot of initial TOF (initial 10 min) versus Ir(ppy)3 concentration. The observed first‑order dependence on photosensitizer concentration confirms that diffusion limitations remain dominant in the H2**LFe** system rather than an enzymatic behavior.

**Continuous-flow photoreactor system for CO2 reduction**

The continuous-flow photoreactor system was engineered with technical support from Beijing Roger Tech, Ltd., featuring an integrated helical microfluidic module constructed from fluorinated ethylene propylene (FEP) tubing (standard *o.d.* 1.6 mm, *i.d.* 0.8 mm; residence volume: 8 mL). Gas flow rates (0.8 mL·min–1) were regulated by a mass flow controller, while liquid flow rates (2.0 mL·min–1) were controlled via a peristaltic pump. An in-line dynamic gas-liquid mixer equipped with a micro stir bar generated segmented Taylor flow (liquid-gas-liquid) upstream of the photoreaction zone, thereby enhancing interfacial contact dynamics. A secondary peristaltic pump recirculated the post-reaction gas-liquid mixture to reactor A. Prior to irradiation, the system was purged with CO2 for 30 min to eliminate atmospheric O2. Under standard catalytic conditions (0.10 μM **H1**, 0.10 mM Ir(ppy)3, 0.25 M TFE, and 50.0 mM BIH in 80 mL CH3CN), the reaction mixture was pre-incubated for 15 min (420 nm LED) prior to catalysis. Unreacted CO2 was removed through a scrubbing unit equipped with a saturated KOH aqueous solution. CO quantification was performed via water-displacement measurement using KOH-saturated solution to ensure maximal accuracy.

**
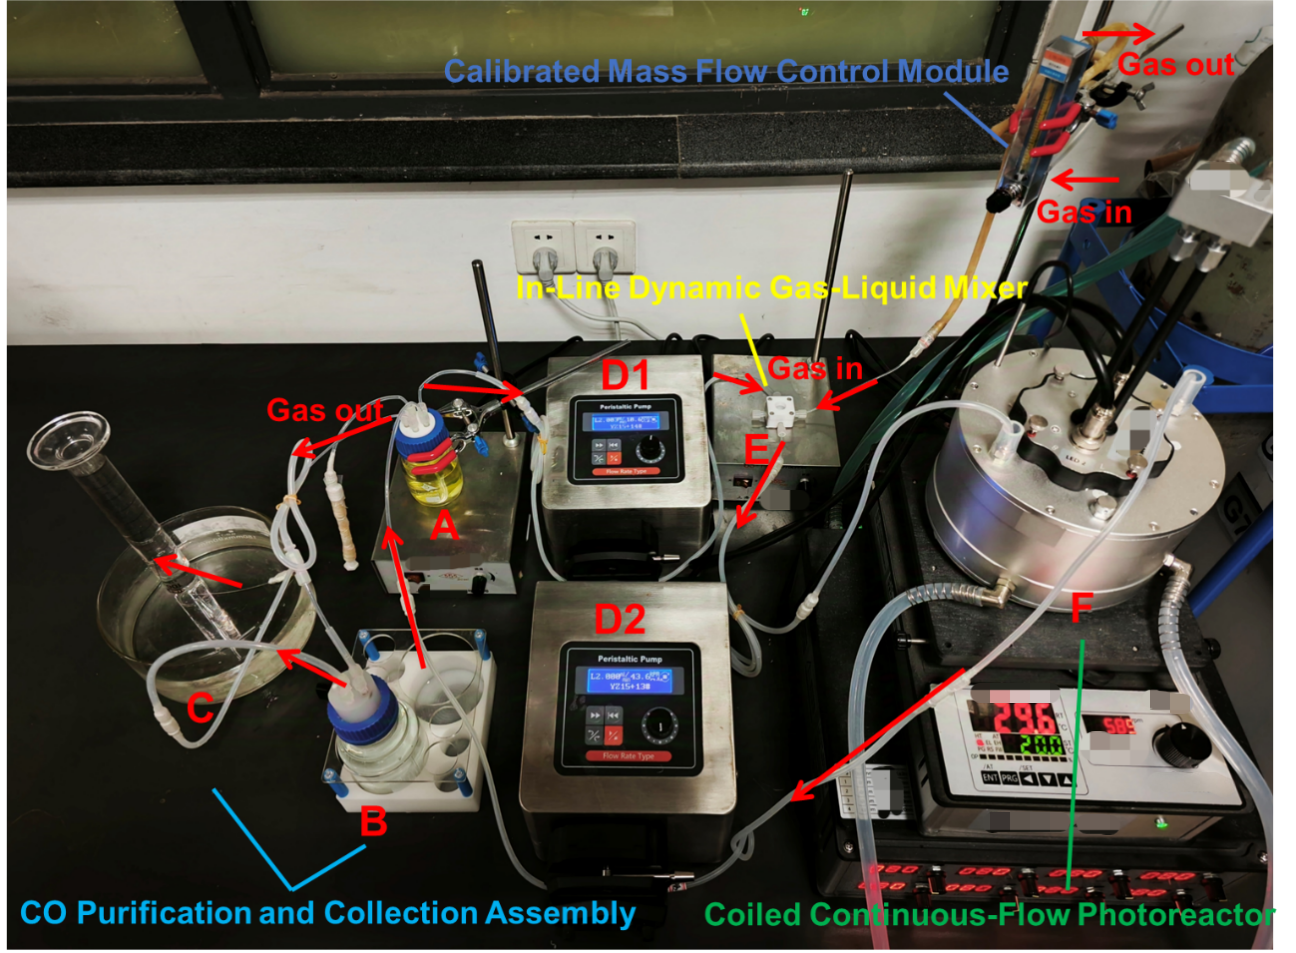
**

**Supplementary Fig. 56.** Schematic of a continuous-flow photoreactor for CO production. Photocatalytic CO2-to-CO conversion was achieved in a coiled flow reactor upon 420 nm LED illumination. The reaction mixture contained 0.10 μM **H1**, 0.10 mM Ir(ppy)3, 0.25 M TFE, 50.0 mM BIH in 80 mL CH3CN. Gas and liquid flow rates were maintained at 0.8 mL·min–1 and 2.0 mL·min–1, respectively, via mass flow controller and peristaltic pump.
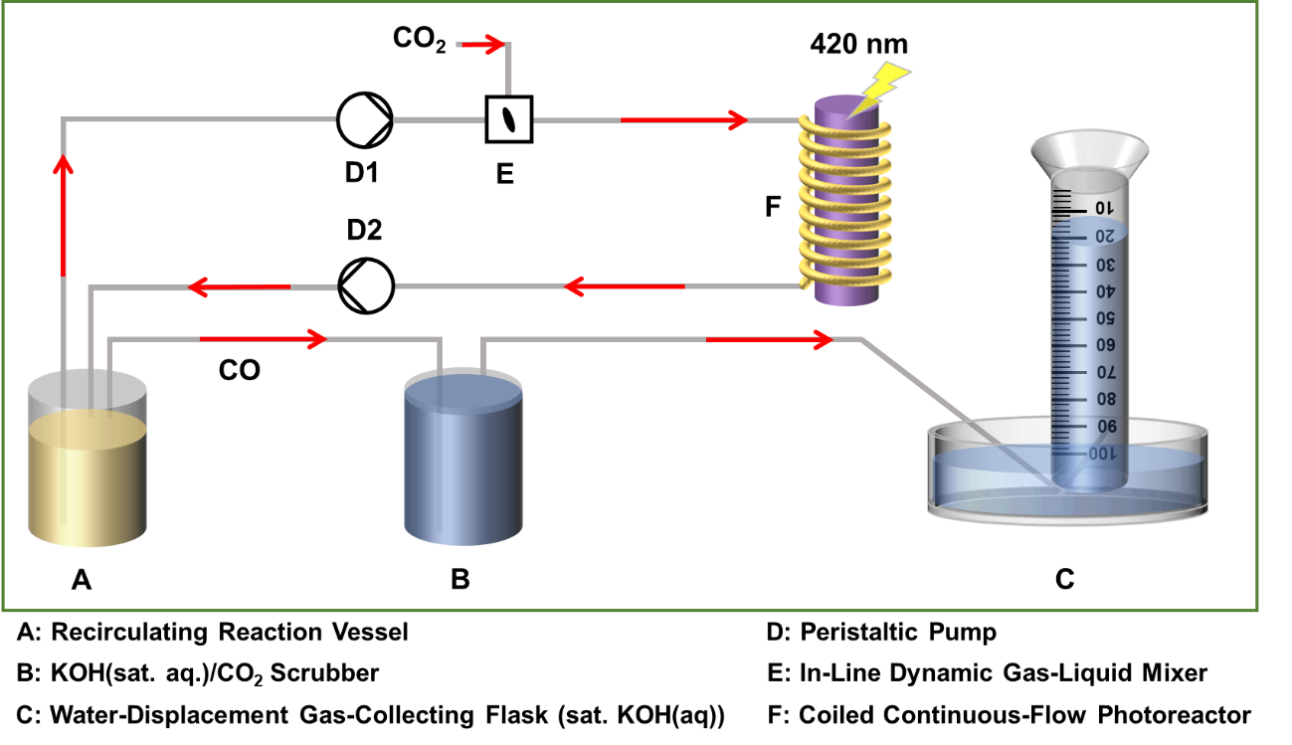


**Supplementary Fig. 57.** Schematic of a laboratory-scale continuous-flow photoreactor system for CO2 reduction.


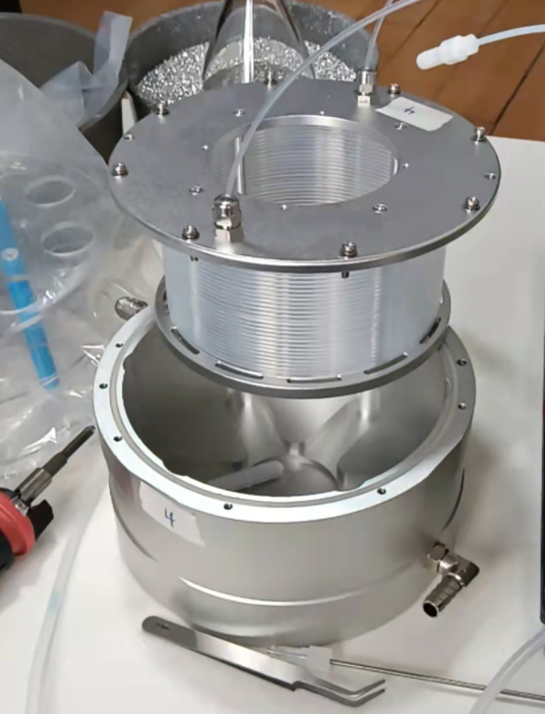

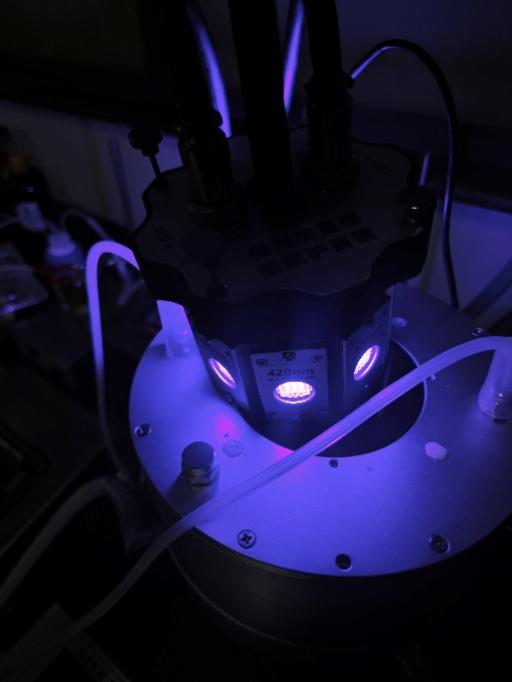


**Supplementary Fig. 58.** Anintegrated helical microfluidic module fabricated from fluorinated ethylene propylene (FEP) tubing (standard *o.d*. 1.6 mm, *i.d*. 0.8 mm; residence volume: 8.0 mL) assembled with a light source consisting of eight identical blue LED chips (λ = 420 nm).

**Supplementary Fig. 59.** In situ FTIR spectra of the **H1**-driven photocatalytic CO2 reduction under standard reaction conditions. All subsequent spectra were corrected by background subtraction to eliminate solvent-derived interference.

**Supplementary Fig. 60.** GC-MS spectrum of CO yielded from the 13CO2 isotope experiment under standard reaction conditions. This result unequivocally identifies CO2 as the carbon source.


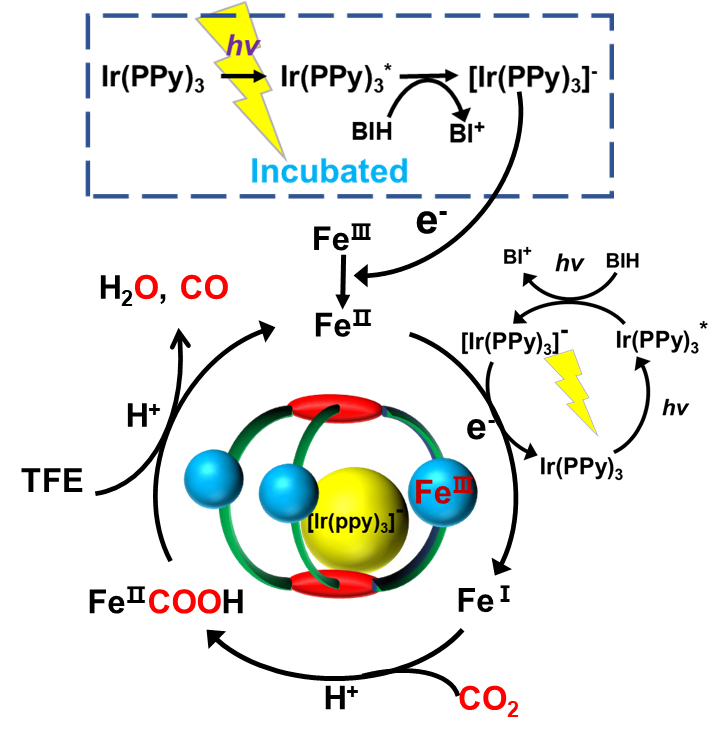


**Supplementary Fig. 61.** Proposed mechanistic diagram for photocatalytic CO2 reduction, illustrating key pathways involving photoexcitation, electron transfer, and photo-incubation.

## 8.2 Photocatalytic oxidative cyclization: General procedure and product characterization

**General procedure for photocatalytic oxidative cyclization**

All photocatalytic reactions were conducted under irradiation from blue LEDs (λ = 420 nm) and maintained at 25℃ through a circulating water bath. Reaction progress was quantitatively monitored by 1H NMR spectroscopy (400 MHz) with periodic sampling (200 μL aliquots withdrawn at 20 min intervals) using 1,3,5-trimethoxy-benzene as an internal standard. Spectral analysis enabled the determination of oxidative cyclization product formation efficiency, with all 1H NMR measurements performed immediately after sample collection to ensure analytical fidelity.

The C–X (X = O, N) coupling reaction was conducted in septum-sealed 15 mL quartz reactors equipped with a magnetic stir bar and water cooling. A solution of 2-substituted imine derivatives (10.0 mM, −OH or −NH2), Ir(ppy)3 (0.10 mM) and TFE (0.25 M) in CH3CN solution (5.0 mL) was degassed by CO2 purging 20 min. The mixture was photo-incubated upon 420 nm LED irradiation (15 min, vigorous stirring). **H1** was then injected, and the irradiation was continued for 2 h. The C–S coupling reaction followed the above procedure using substituted 2-aminothiophenol (10.0 mM) and benzaldehyde derivative (10.0 mM) as substrates. After the mixture was photo-incubated (15 min, vigorous stirring), **H1** was subsequently injected, and continuously irradiated for 2 h.

**Supplementary Fig. 62.** Photocatalytic kinetics of substrate intramolecular C–N (**1a**), C–S (**2a**), and C–O (**3a**) cross-coupling reactions under optimized conditions: **H1** (1.0 μM), Ir(ppy)3 (0.10 mM), TFE (0.25 M) and substrate (10.0 mM) in CH3CN solution.

**Supplementary Fig. 63.** Linear free-energy relationship analysis of reaction kinetics versus Hammett *σ*p parameters with isolated product yields.

**Supplementary Fig. 64.** Temporal evolution of photocatalytic C–N coupling product **4a** yield under varied irradiation intensities (λem = 420 nm, 250 and 125 mW·cm−2). Reaction system: Ir(ppy)3 (0.10 mM), **1a** (10.0 mM), TFE (0.25 M) and **H1** (0.10 μM) in CH3CN solution under CO2 atmosphere, at room temperature.


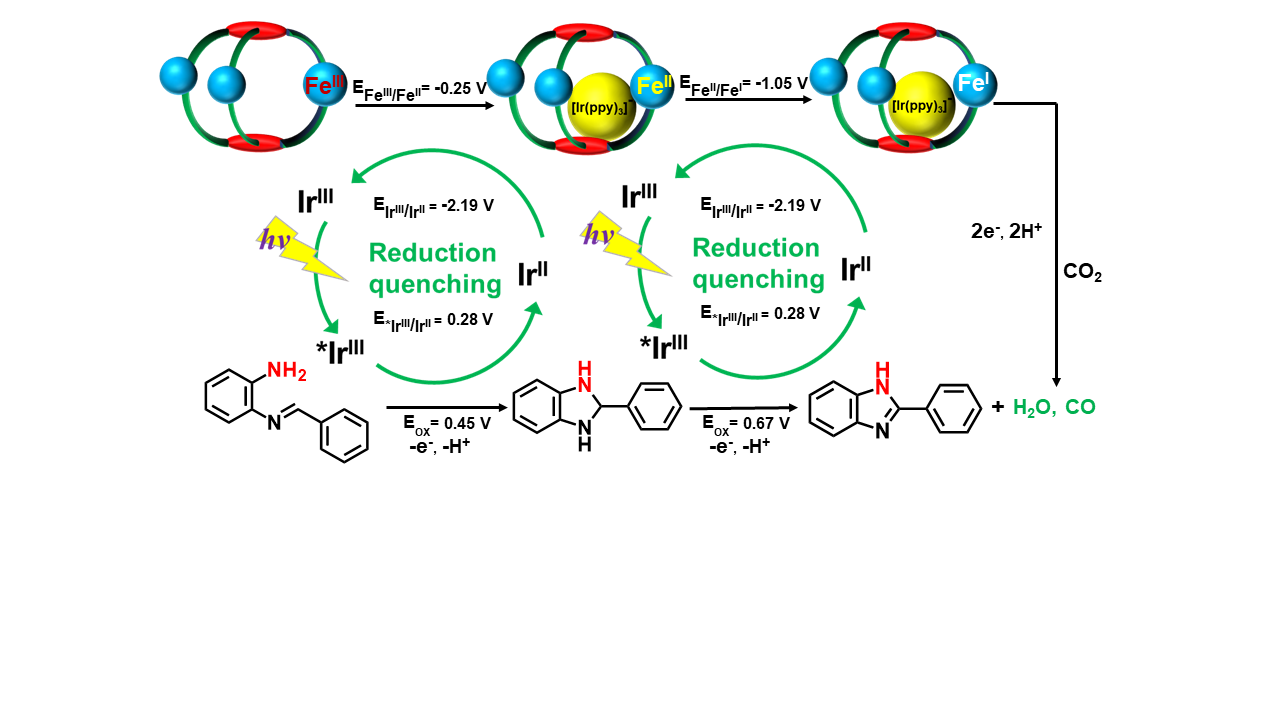


**Supplementary Fig. 65.** The pre-organization of photocatalyst within the coordination capsule and the concomitant thermodynamic activation of the substrate for the unique two-photon-driven oxidative cyclization reaction.


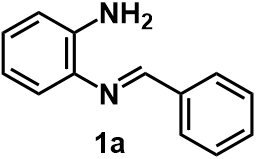
1H NMR (400 MHz) spectrum of **1a** in CDCl3. 1H NMR (400 MHz, CDCl3, ppm): *δ* 8.54 (s, 1H), 7.91 (dt, *J* = 7.6, 3.2 Hz, 2H), 7.51–7.39 (m, 3H), 7.07 (t, *J* = 7.7 Hz, 2H), 6.81–6.67 (m, 2H), 4.09 (s, 2H).


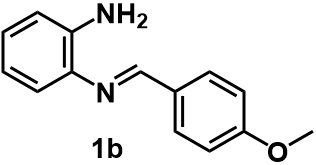
1H NMR (400 MHz) spectrum of **1b** in CDCl3. 1H NMR (400 MHz, CDCl3, ppm): *δ* 8.49 (s, 1H), 7.89 (d, *J* = 8.7 Hz, 2H), 7.07 (dd, *J* = 13.6, 7.7 Hz, 2H), 7.01 (d, *J* = 8.6 Hz, 2H), 6.84–6.74 (m, 2H), 3.90 (s, 3H).


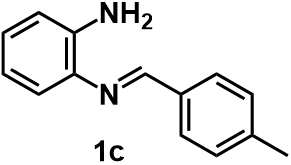
1H NMR (400 MHz) spectrum of **1c** in CDCl3. 1H NMR (400 MHz, CDCl3, ppm): *δ* 8.50 (s, 1H), 7.80 (d, *J* = 8.1 Hz, 2H), 7.28–7.23 (m, 2H), 7.05 (t, *J* = 8.9 Hz, 2H), 6.81–6.68 (m, 2H), 4.23 (s, 2H), 2.41 (s, 3H).


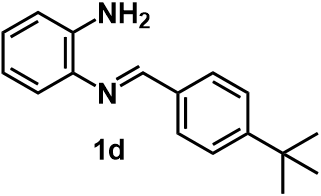
1H NMR (400 MHz) spectrum of **1d** in CDCl3. 1H NMR (400 MHz, CDCl3, ppm): *δ* 8.51 (s, 1H), 7.83 (dd, *J* = 11.9, 8.4 Hz, 2H), 7.49 (d, *J* = 8.3 Hz, 2H), 7.04 (dd, *J* = 8.2, 4.5 Hz, 2H), 6.84–6.65 (m, 2H), 1.36 (s, 9H).


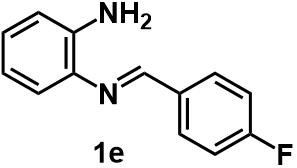
1H NMR (400 MHz) spectrum of **1e** in CDCl3. 1H NMR (400 MHz, CDCl3, ppm): *δ* 8.50 (s, 1H), 7.98–7.82 (m, 2H), 7.21–7.10 (m, 2H), 7.10–6.98 (m, 2H), 6.83–6.65 (m, 2H), 4.30 (s, 2H).


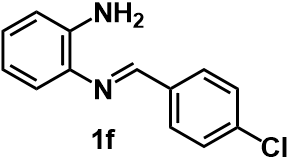
1H NMR (400 MHz) spectrum of **1f** in CDCl3. 1H NMR (400 MHz, CDCl3, ppm): *δ* 8.53 (s, 1H), 7.87 (d, *J* = 8.4 Hz, 2H), 7.46 (d, *J* = 8.4 Hz, 2H), 7.22–7.00 (m, 2H), 6.87–6.71 (m, 2H), 4.19 (s, 2H).


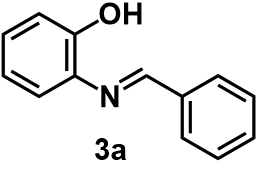
1H NMR (400 MHz) spectrum of **3a** in CDCl3. 1H NMR (400 MHz, CDCl3, ppm): *δ* 8.70 (s, 1H), 7.92 (dd, *J* = 7.2, 2.4 Hz, 2H), 7.61–7.40 (m, 3H), 7.31 (dd, *J* = 7.9, 1.3 Hz, 1H), 7.27–7.13 (m, 2H), 7.02 (dd, *J* = 8.1, 1.2 Hz, 1H), 6.91 (td, *J* = 7.9, 1.3 Hz, 1H).


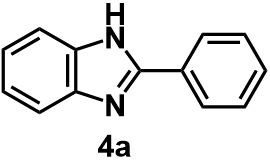
1H NMR (400 MHz) spectrum of the product after photocatalysis of substrate **4a** inDMSO-*d6*. The product is obtained as white solid. 1H NMR (400 MHz, DMSO-*d6*): *δ* 12.90 (s, 1H), 8.19 (dt, *J* = 8.3, 1.9 Hz, 2H), 7.67 (d, *J* = 7.3 Hz, 1H), 7.64–7.42 (m, 4H), 7.21 (q, *J* = 5.7 Hz, 2H).


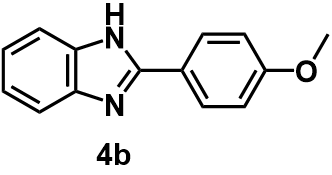
1H NMR (400 MHz) spectrum of the product after photocatalysis of substrate **4b** inDMSO-*d6*. The product is obtained as white solid. 1H NMR (400 MHz, DMSO-*d6*): *δ* 12.73 (s, 1H), 8.12 (d, *J* = 8.8 Hz, 2H), 7.62 (d, *J* = 7.1 Hz, 1H), 7.49 (d, *J* = 6.9 Hz, 1H), 7.18 (q, *J* = 6.7, 6.2 Hz, 2H), 7.12 (d, *J* = 8.8 Hz, 2H), 3.85 (s, 3H).


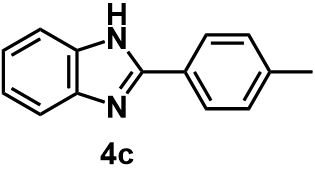
1H NMR (400 MHz) spectrum of the product after photocatalysis of substrate **4c** inDMSO-*d6*. The product is obtained as white solid. 1H NMR (400 MHz, DMSO-*d6*): *δ* 12.82 (s, 1H), 8.08 (d, *J* = 8.2 Hz, 2H), 7.58 (s, 2H), 7.36 (d, *J* = 7.9 Hz, 2H), 7.20 (dt, *J* = 6.0, 3.6 Hz, 2H), 2.38 (s, 3H).


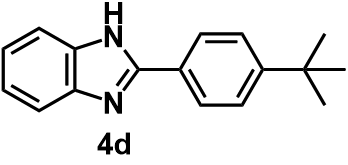
1H NMR (400 MHz) spectrum of the product after photocatalysis of substrate **4d** inDMSO-*d6*. The product is obtained as white solid. 1H NMR (400 MHz, DMSO-*d6*): *δ* 12.86 (s, 1H), 8.12 (d, *J* = 8.5 Hz, 2H), 7.58 (t, *J* = 6.9 Hz, 4H), 7.20 (dd, *J* = 6.0, 3.2 Hz, 2H), 1.34 (s, 9H).


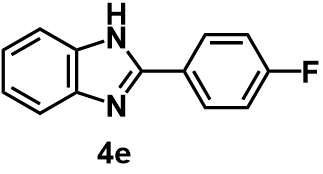
1H NMR (400 MHz) spectrum of the product after photocatalysis of substrate **4e** inDMSO-*d6*. The product is obtained as white solid. 1H NMR (400 MHz, DMSO-*d6*): *δ* 12.91 (s, 1H), 8.23 (dd, *J* = 8.3, 5.7 Hz, 2H), 7.60 (d, *J* = 45.7 Hz, 2H), 7.41 (t, *J* = 8.7 Hz, 2H), 7.26–7.14 (m, 2H).


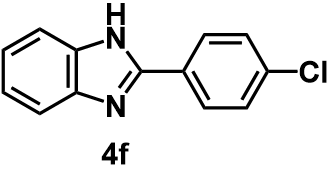
1H NMR (400 MHz) spectrum of the product after photocatalysis of substrate **4f** inDMSO-*d6*. The product is obtained as white solid. 1H NMR (400 MHz, DMSO-*d6*): *δ* 12.99 (s, 1H), 8.30–8.04 (m, 2H), 7.64 (dd, *J* = 9.0, 2.2 Hz, 4H), 7.23 (d, 2H).


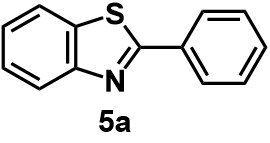
1H NMR (400 MHz) spectrum of **5a** in CDCl3. The product is obtained as white solid. 1H NMR (400 MHz, CDCl3): *δ* 8.21–8.06 (m, 3H), 7.94 (d, *J* = 8.0 Hz, 1H), 7.53 (q, *J* = 7.0, 5.3 Hz, 4H), 7.43 (d, *J* = 8.0 Hz, 1H).


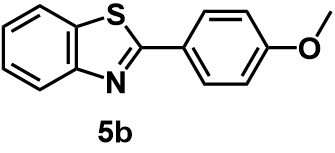
1H NMR (400 MHz) spectrum of **5b** in CDCl3. The product is obtained as white solid. 1H NMR (400 MHz, CDCl3): *δ* 7.96 (d, *J* = 8.8 Hz, 3H), 7.79 (d, *J* = 7.9 Hz, 1H), 7.39 (t, *J* = 7.7 Hz, 1H), 7.27 (t, *J* = 7.6 Hz, 1H), 6.92 (d, *J* = 8.8 Hz, 2H), 3.80 (s, 3H).


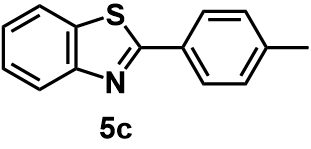
1H NMR (400 MHz) spectrum of **5c** in CDCl3. The product is obtained as white solid. 1H NMR (400 MHz, CDCl3): *δ* 8.12 (d, *J* = 8.2 Hz, 1H), 8.03 (d, *J* = 8.2 Hz, 2H), 7.90 (d, *J* = 7.9 Hz, 1H), 7.51 (t, *J* = 7.7 Hz, 1H), 7.40 (t, *J* = 8.0 Hz, 1H), 7.32 (d, *J* = 7.9 Hz, 2H), 2.44 (s, 3H).


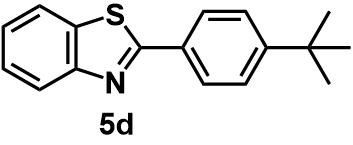
1H NMR (400 MHz) spectrum of **5d** in CDCl3. The product is obtained as white solid. 1H NMR (400 MHz, CDCl3): *δ* 7.97 (dd, *J* = 15.8, 8.1 Hz, 3H), 7.81 (d, *J* = 7.7 Hz, 1H), 7.47–7.40 (m, 3H), 7.29 (s, 1H), 1.29 (s, 9H).


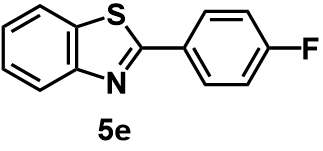
1H NMR (400 MHz) spectrum of **5e** in CDCl3. The product is obtained as white solid. 1H NMR (400 MHz, CDCl3): *δ* 8.22–8.03 (m, 3H), 7.91 (d, *J* = 7.5 Hz, 1H), 7.54–7.48 (m, 1H), 7.41 (t, *J* = 7.6 Hz, 1H), 7.20 (t, *J* = 8.7 Hz, 2H).


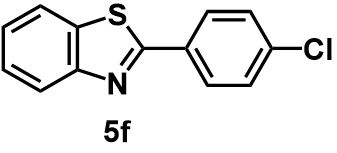
1H NMR (400 MHz) spectrum of **5f** in CDCl3. The product is obtained as white solid. 1H NMR (400 MHz, CDCl3): *δ* 8.10 (d, *J* = 8.2 Hz, 1H), 8.08–8.03 (m, 2H), 7.92 (d, *J* = 8.0 Hz, 1H), 7.55–7.46 (m, 3H), 7.44–7.39 (m, 1H).

# 9. Supplementary References

1. Lou, Z., Hou, Y., Chen, K., Zhao, J., Ji, S., Zhong, F., Dede, Y., Dick, B. Different quenching effect of intramolecular rotation on the singlet and triplet excited states of bodipy. *J. Phys. Chem.C* **122**, 185−193 (2018).

2. Dolomanov, O. V., Bourhis, L. J., Gildea, R. J., Howard, J. A. K., Puschmann, H. OLEX2: a complete structure solution, refinement and analysis program. *J. Appl. Cryst.* **42**, 339−341 (2009).

3. Gong, Y., Zhao, S., Wang, H., Ge, Z., Liao, C., Tao, K., Zhong, D., Sakai, K., Lu, T. A Planar-Structured Dinuclear Cobalt(II) Complex with Indirect Synergy for Photocatalytic CO2-to-CO Conversion. *Angew. Chem. Int. Ed.* **63**, e202411639 (2024).

4. Yuan, H., Cheng, B., Lei, J., Jiang, L., Han, Z. Promoting photocatalytic CO2 reduction with a molecular copper purpurin chromophore. *Nat. Commun.* **12**, 1835 (2021).

5. Kamogawa, K., Koizumi, H., Ishitani, O. Efficient and Selective Photocatalytic Conversion of Low-Concentration CO2 to CO Using Mn-Complex Catalysts. *J. Am. Chem. Soc.* **147**, 39284–39297 (2025).

6. Zhang, X., Cibian, M., Call, A., Yamauchi, K., Sakai, K. Photochemical CO2 reduction driven by water-soluble copper(I) photosensitizer with the catalysis accelerated by multi-electron chargeable cobalt porphyrin. *ACS Catal.* **9**, 11263–11273 (2019).

7. Yuan, H., Yu, Y., Yang, S., Lei, Q., Yang, Z., Lan, B., Han, Z. Photocatalytic CO2 reduction with iron porphyrin catalysts and anthraquinone dyes. *Chem. Commun.* **60**, 6292−6295 (2024).

8. Arcudi, F., Đorđević, L., Nagasing, B., Stupp, S. I., Weiss, E. A. Quantum Dot-Sensitized Photoreduction of CO2 in Water with Turnover Number > 80,000. *J. Am. Chem. Soc.* **143**, 18131–18138 (2021).

9. An, L., Torre, P. D. L., Smith, P. T., Narouz, M. R., Chang, C. J. Synergistic Porosity and Charge Effects in a Supramolecular Porphyrin Cage Promote Efficient Photocatalytic CO2 Reduction. *Angew. Chem. Int. Ed.* **62**, e202209396 (2023).

10. Zhong, Y., Wang, Y., Zhao, S., Xie, Z., Chung, L., Liao, W., Yu, L., Wong, W., He, J. Regulating the Electronic Configuration of Ni Sites by Breaking Symmetry of Ni-Porphyrin to Facilitate CO2 Photocatalytic Reduction. *Adv. Funct. Mater.* **34**, 2316199 (2024).

11. Zhang, X., Yamauchi, K., Sakai, K. Earth-Abundant Photocatalytic CO2 Reduction by Multielectron Chargeable Cobalt Porphyrin Catalysts: High CO/H2 Selectivity in Water Based on Phase Mismatch in Frontier MO Association. *ACS Catal.* **11**, 10436–10449 (2021).

12. Li, Y., Wang, S., Wang, X., He, Y., Wang, Q., Li, Y., Li, M., Yang, G., Yi, J., Lin, H., Huang, D., Li, L., Chen, H., Ye, J. Facile Top-Down Strategy for Direct Metal Atomization and Coordination Achieving a High Turnover Number in CO2 Photoreduction. *J. Am. Chem. Soc.* **142**, 19259–19267 (2020).

13. Cocosila, I., Solé-Daura, A., Gotico, P., Forte, J., Li, Y., Fontecave, M. Visible-Light-Driven Carbon Dioxide Reduction Catalyzed by Iron Schiff-Base Complexes. *ACS Catal.* **14**, 9618–9627 (2024).

14. Jiang, Z., Wang, P., Liang, G., Wen, X., Huang, G., Song, H., Jiang, B., Jin, S., Xu, F., Ding, X., Kim, T. K., Chen, H., Yu, J., Ye, J., Wang, S. Homogeneous–Heterogeneous Hybrid Artificial Photosynthesis Induced by Organic Semiconductors with Controlled Surface Architectures. *Adv. Funct. Mater.* **33**, 2303335 (2023).

15. Wang, P., Guo, S., Zhao, Q., Xu, S., Lv, H., Lu, T., Zhang, Z. Identification of Crucial Photosensitizing Factors to Promote CO2-to-CO Conversion. *Angew. Chem. Int. Ed.* **63**, e202312450 (2024).

16. Li, Z., Wang, J., Huang, Y., Ouyang, G. Enhancing CO2 photoreduction *via* the perfluorination of Co(II) phthalocyanine catalysts in a noble-metal-free system. *Chin. J. Catal.* **49**, 160−167 (2023).

17. Wang, J., Ma, F., Jin, T., He, P., Luo, Z., Kupfer, S., Karnahl, M., Zhao, F., Xu, Z., Jin, T., Lian, T., Huang, Y., Jiang, L., Fu, L., Ouyang, G., Yi, X. Homoleptic Al(III) Photosensitizers for Durable CO2 Photoreduction. *J. Am. Chem. Soc.* **145**, 676–688 (2023).

18. Ma, B., Chen, G., Fave, C., Chen, L., Kuriki, R., Maeda, K., Ishitani, O., Lau, T., Bonin, J., Robert, M. Efficient Visible-Light-Driven CO2 Reduction by a Cobalt Molecular Catalyst Covalently Linked to Mesoporous Carbon Nitride. *J. Am. Chem. Soc.* **142**, 6188–6195 (2020).

19. Xiao, Y., Zhang, H., Zhang, M. Heterobimetallic NiFe Complex for Photocatalytic CO2 Reduction: United Efforts of NiFe Dual Sites. *J. Am. Chem. Soc.* **146**, 28832–28844 (2024).

20. Thoi, V. S., Kornienko, N., Margarit, C. G., Yang, P., Chang, C. J. Visible-Light Photoredox Catalysis: Selective Reduction of Carbon Dioxide to Carbon Monoxide by a Nickel N-Heterocyclic Carbene–Isoquinoline Complex. *J. Am. Chem. Soc.* **135**, 14413–14424 (2013).
